# Supplementary material for: Chromatin structure influences rate and spectrum of spontaneous mutations in Neurospora crassa
Source: HighWire-hosted journal article supplement (doi:10.1101/gr.276992.122), 2023-03-15
Supplement: Supplemental_Information.pdf [file Supplemental_Information.pdf]

**Supplementary Information**

Supplemental information for the article: Chromatin structure influences rate and spectrum of spontaneous mutations in *Neurospora crassa*. By Mariana Villalba de la Peña, Pauliina A. M. Summanen, Martta Liukkonen, and Ilkka Kronholm.

**Contents**

Supplementary methods . . . . . 2

    Mutation accumulation experiment . . . . . 2

    Estimating the number of mitoses in the MA experiment . . . . . 3

    DNA extraction . . . . . 7

    Read mapping and genotyping . . . . . 8

    Genotyping structural variants . . . . . 9

    Genotyping copy number variants . . . . . 11

    Chromatin modifications . . . . . 12

    Analysis of relative mutation rate for different classes . . . . . 12

    Mutation rate variation across the genome . . . . . 13

    Effects of local sequence context . . . . . 15

Supplementary results . . . . . 16

    Accuracy of mutation calling . . . . . 16

    Simulating variation in mutation rate . . . . . 20

    Robustness of relationship between  $\theta$  and predicted mutation rate . . . . . 21

    Re-analysis of data from Wang et al. 2020 . . . . . 23

Supplementary Figures . . . . . 31

Supplementary Tables . . . . . 53

## Supplementary methods

### Mutation accumulation experiment

We started the MA experiment with two different strains: 2489 *mat A* and 2489 *mat a*. We have previously generated these strains by backcrossing mating type *mat a* from strain 4200 into 2489 nine times (Kronholm et al., 2020). The strains differ in their mating types, but should share over 98% of the rest of their genetic background. Their Fungal Genetics Stock Center ID's are: B 26708 and B 26709. We used 20 lines for both these strains, giving 40 MA lines in total. We used two different mating types to later have the possibility to perform crosses between the MA lines. However, for this study the mating types of the lines do not matter as all propagation was asexual.

Common protocols for culturing *N. crassa* were followed, and sorbose plates were used to induce colonial morphology on plates (Davis and de Serres, 1970). The experiment was started by picking a single colony from a sorbose plate for both ancestors and transferring that colony into a 75×12 mm test tube with flat surface of 1 mL of Vogel's Medium (VM) with 1.5% agar and 1.5% sucrose (Metzenberg, 2003). Tubes were incubated at 25 °C for 3 days to allow conidia (asexual spores) to develop. Then we picked small amount of conidia with a loop into a tube with 1.4 mL of 0.01% Tween-80, we then pipetted 1 µL of this conidial suspension into a 50 µL water droplet on a sorbose plate and spread it. We incubated the plates at room temperature for 2 days and picked single colonies to establish the MA lines. The MA lines were transferred the same way, so that a single colony was always picked randomly from a sorbose plate to propagate the MA line (Figure 1B). We tested that 2 days of incubation was enough time for all colonies to appear on plates. Combining the time of 2 days on plates and 3 days in a tube, a single transfer took 5 days. We propagated the MA lines for 40 transfers, the ancestors and the MA lines were stored frozen in suspended animation until sequencing.

## Estimating the number of mitoses in the MA experiment

To estimate the mutation rate per mitosis, we needed to estimate how many mitoses happened in the MA lines during the experiment. To estimate the number of mitoses that happened during one transfer, we needed to obtain data about the number of nuclei present in each phase of a transfer: in a colony on a sorbose plate, in the mycelium in a test tube, and the conidia produced in the test tube. To estimate the density of nuclei per  $\mu\text{m}^2$  of hyphae we used the strain *mat A his-3<sup>+</sup>::Pccg-1-hH1<sup>+</sup>-sgfp<sup>+</sup>* (FGSC# 9518) which expressed a green fluorescent protein that had been fused into histone H1 (Freitag et al., 2004). We grew the strain on plates with either normal VM medium or sorbose medium, cut out a piece of the agar, and mounted it on a glass coverslip using the inverted agar block method (Lichius and Zeilinger, 2019). We used Congo Red to stain cell walls: a 20  $\mu\text{L}$  droplet with 2  $\mu\text{M}$  Congo Red was pipetted to a glass coverslip and an agar block with the side carrying the mycelium was placed face down in the droplet.

Samples were imaged with a Nikon A1R confocal microscope, GFP was excited with a 488 nm laser and detected with a 515/30 emission filter, Congo Red was excited with a 561 nm laser and detected with a 595/50 emission filter. Plan apochromat air objectives 20x (numerical aperture 0.75) and 40x (numerical aperture 0.95) were used. Laser power was set as low as possible to avoid saturated pixels. We imaged vertical stacks of the mycelium, and used imageJ2 (Rueden et al., 2017) to measure the area covered by hyphae in sections of the image, and counted the number of nuclei in these areas (Figure 1C).

We then estimated the number of nuclei in the different phases of a transfer, and calculated the number of mitoses that the MA lines went through. The number of nuclei can only increase when the old nuclei divide. If we know the number of initial nuclei and the number of nuclei at time  $t$ , we can calculate the number of mitoses,  $m$ , that separate these time points from the equation

$$m = \log_2 \left( \frac{n_t}{n_i} \right) \quad (\text{S1})$$

where  $n_i$  is the initial number of nuclei, and  $n_t$  the number of nuclei at time  $t$ . Thus, in order to

834 estimate number of mitoses that happened in the MA lines during one transfer, we need to count  
835 how many nuclei were present in the colonies on sorbose plates that were picked and transferred  
836 to slants, and how many nuclei were in the mycelium that formed in the test tube, and finally how  
837 many nuclei were in the conidia that formed in the test tube (Figure 1B). This allows us to calculate  
838 how many mitoses happened during one transfer of the MA experiment, from one spore to a spore.  
839 There are multiple sources of uncertainty in these calculations, so we used a Bayesian framework  
840 to do the calculations using posterior distributions of the estimates to incorporate all sources of  
841 uncertainty in the final estimate.

842 Nuclei were counted from the microscope images using Fiji2 version 2.0.0-rc-54/1.51g (Schin-  
843 delin et al., 2012). Short sections of mycelium were surrounded with the rectangular selection  
844 tool and the area inside was measured. All nuclei with more than 50% of their diameter inside  
845 the selection were counted manually. Multiple sections were counted from each image, with no  
846 overlap. In some fainter images, the contrast was enhanced with the enhance contrast tool, with  
847 the default value 0.3% saturated pixels and no histogram equalization. To estimate the number  
848 of nuclei in a given area of hyphae, we used the counts of nuclei and the hyphal areas measured  
849 from the microscope images to obtain the number of nuclei per  $\mu\text{m}^2$ . We had images for both VM  
850 and sorbose plates, in total we collected 519 measurements. To estimate average density of nuclei  
851 for VM and sorbose we used a model where we allowed standard deviations to differ for VM and  
852 sorbose media:

$$\begin{aligned}
y_i &\sim \text{N}(\mu_i, \sigma_i) & (\text{S2}) \\
\mu_i &= \rho + \beta_s x_i \\
\log(\sigma_i) &= \alpha_\sigma + \beta_\sigma x_i \\
\rho, \beta_s &\sim \text{N}(0, 0.1) \\
\alpha_\sigma, \beta_\sigma &\sim \text{hT}(3, 0, 10)
\end{aligned}$$

853 where  $y_i$  is the  $i$ th density measurement,  $\rho$  is the intercept,  $\beta_s$  is the effect of sorbose medium,  $x_i$   
854 an indicator variable for sorbose,  $\alpha_\sigma$  is the intercept for standard deviation, and  $\beta_\sigma$  is the effect of  
855 sorbose medium on standard deviation. The average density of nuclei in VM medium is  $\rho$  and the  
856 density of nuclei in sorbose is obtained as  $\rho_s = \rho + \beta_s$ .

857 To estimate the average size of colonies on sorbose plates, we plated conidia on sorbose plates  
858 as in the MA experiment and photographed the plates. Millimeter paper was used as a scale.  
859 Colony area was measured from these images with ImageJ2 version 2.0.0-rc-43/1.50e. The pixels  
860 per millimeter calibration value was set by measuring the number of pixels per 1 mm of millimeter  
861 paper. The images were enhanced with the sharpen tool to make the colony outlines more distinct.  
862 The colony area was measured using the elliptical selection tool. We used 10 different genotypes  
863 from different MA lines and timepoints in this experiment, including the 2 ancestors. We collected  
864 a dataset with 482 area measurements. To estimate the average colony size, we fitted a multilevel  
865 model

$$y_i \sim N(\mu_i, \sigma) \tag{S3}$$

$$\mu_i = \alpha_{g[i]}$$

$$\alpha_g \sim N(\bar{\alpha}, \sigma_g)$$

$$\bar{\alpha} \sim N(0, 3)$$

$$\sigma, \sigma_g \sim \text{hT}(3, 0, 10)$$

866 where  $y_i$  is the  $i$ th area measurement,  $\bar{\alpha}$  is the overall mean,  $\alpha_j$  is the mean for  $j$ th genotype,  $\sigma_g$   
867 is the genotype standard deviation, and  $\sigma$  is the error standard deviation. Standard deviations had  
868 a weakly informative prior, which was the half-location scale version of Student's t-distribution,  
869 where 3 is the degrees of freedom, 0 is the location, and 10 is the scale parameter. We estimated

the number of nuclei in a sorbose plate colony,  $n_s$ , as

$$n_s = \bar{\alpha} \times 10^6 \times \rho_s \quad (\text{S4})$$

the average colony size is multiplied by  $10^6$  to transform the unit from  $\text{mm}^2$  to  $\mu\text{m}^2$ .

Once the sorbose colony is transferred to the test tube, the mycelium will cover the surface of the growth media. We estimated the number of nuclei present in the mycelium,  $n_v$  by multiplying the surface of the media in the test tube with the density of nuclei in the hyphae in VM medium:

$$n_v = \pi(d/2)^2 \times 10^6 \times \rho \quad (\text{S5})$$

where  $d$  is the diameter of the test tubes (in mm) used in the experiment, area is multiplied by  $10^6$  to transform the unit to  $\mu\text{m}^2$ .

To estimate the number of conidia produced by the mycelium in the test tube, we counted conidia by suspending them in 1 mL of 0.01% Tween-80, making a 10000-fold dilution of the suspension, and plating 10  $\mu\text{L}$  of the dilution on sorbose plates. We counted the colonies that were formed, and estimated the original number of conidia produced. We used 10 different genotypes, including the ancestors from the MA experiment to estimate produced conidia. We collected 71 measurements, the model was

$$y_i \sim \text{N}(\mu_i, \sigma) \quad (\text{S6})$$

$$\mu_i = \nu_{g[i]}$$

$$\nu_g \sim \text{N}(\bar{\nu}, \sigma_g)$$

$$\bar{\nu} \sim \text{hT}(3, 40, 21)$$

$$\sigma, \sigma_g \sim \text{hT}(3, 0, 21)$$

where  $y_i$  is the  $i$ th conidial number measurement,  $\bar{\nu}$  is the overall mean,  $\alpha_j$  is the mean for  $j$ th

genotype,  $\sigma_g$  is the genotype standard deviation, and  $\sigma$  is the error standard deviation. Priors followed Student's t-distribution. The number of nuclei contained by the conidia,  $n_c$  was estimated as

$$n_c = 2\bar{\nu} \quad (S7)$$

since the mode of nuclei in conidia of *N. crassa* is two.

The number of mitotic divisions separating two time points can be calculated from equation S1. First, we need to calculate the number of divisions that happened when a single spore grows to a colony on sorbose plate, then the number of divisions when the colony grows to a lawn of mycelium in the test tube, and finally the number of divisions it takes to form the final number of conidia. Thus, using the posterior distributions of numbers of nuclei in the different phases of the transfer and equation S1, we can calculate the number of mitoses that happen during a transfer,  $m$ , as:

$$m = \log_2 \left( \frac{n_s}{2} \right) + \log_2 \left( \frac{n_s + n_v}{n_s} \right) + \log_2 \left( \frac{n_s + n_v + n_c}{n_s + n_v} \right)$$

which simplifies to

$$m = \log_2 (n_s + n_v + n_c) - 1 \quad (S8)$$

this estimate of the number of mitoses incorporates all sources of measurement error since posterior distributions are used in every step of the calculations.

## DNA extraction

To get high quality DNA for sequencing, the natural strains, MA lines, and the ancestors were grown in 5 mL of liquid VM for two days at 25 °C with shaking. We harvested the mycelium and freeze dried it over night in a lyophilizer. Dried mycelium was then ground with a glass bead in Qiagen Tissue Lyzer for two times 20 s with frequency of 25 s<sup>-1</sup>. Then 500 µL of extraction buffer was added (10 mM Tris pH 8, 0.1 M EDTA, 150 mM NaCl, and 2% SDS), and the powdered tissue dissolved by shaking. Then samples were extracted with 750 µL of 25:24:1 Phenol:Chloroform:Isoamylalcohol and keeping the aqueous phase. We added 2 µL of RNase A (10

mg/mL) and 50 U of RNase I to each sample and incubated them for 1 h at 37 °C. Samples were then extracted with 750 µL of chloroform, 1 mL of 100% ethanol was added, and DNA was precipitated for 1 h at −20 °C. Then DNA was pelleted with centrifugation at 4 °C, ethanol aspirated, pellet washed with 70% ethanol, and air dried. We then added 77.5 µL of TE-buffer to elute the samples and incubated at 37 °C to help dissolve the pellets. We observed that occasional small DNA fragments would remain in the samples and to remove these we did a polyethyleneglycol precipitation: we added 12.5 µL of 4 M NaCl, mixed and added 12 µL 50% PEG (P3350), mixed and precipitated DNA over night at 4 °C. DNA was then pelleted with centrifugation and the supernatant aspirated, the pellet was washed twice with 70% ethanol, and aspirated. Pellets were eluted to 55 µL of TE-buffer as above. DNA concentrations were measured with the Qubit Broad Range Kit, and DNA quality was checked by running 2 µL of the sample on an 0.8% agarose gel.

#### **Read mapping and genotyping**

To be able to map reads to the mating type locus in the *mat a* strains, we included the mating type *a* region, as well as the mitochondrial genome, as additional contigs. Reads were mapped using BWA-MEM version 0.7.12-r1039 with default parameters (Li, 2013). Alignment files were sorted and indexed with samtools and read groups were added with picardtools. See table S1 for alignment metrics.

We used the GATK version 4.2.0.0 (McKenna et al., 2010) pipeline to call single nucleotide mutations (SNMs) and small indels. First, we ran Haplotypecaller for each sample individually to make a g.vcf file. Haplotypecaller was run with otherwise default parameters, emitting all sites, and in diploid mode. We then consolidated all of the samples together into a database using the GenomicsBDImport function in GATK. Samples were then jointly genotyped with the GenotypeGVCFs function to produce a vcf file with all samples.

We used wormtable version 0.1.5 (Kelleher et al., 2013) to convert the vcf file into an indexed database and then a custom Python script to filter for high quality sites. For a site to be included as a candidate mutation, first we required the genotypes of the ancestor and the MA line to differ



for that site. Second, the site had to have five or more reads from both the ancestor and the sample. Third, the site had to have genotype quality greater or equal to 30 for both the ancestor and the sample, and finally sites that were called heterozygous in either the ancestor or the sample were excluded. There was also a filter that a site could not be called as a mutation if all of the MA lines had the same genotype. Sites were considered as invariant if their reference genotype quality was greater or equal to 30.

To produce the final dataset of curated mutations, we checked all candidate mutations manually by inspecting the alignments from BWA and or Haplotypcaller in IGV (Thorvaldsdóttir et al., 2013). Based on our manual inspection our filtering criteria were stringent enough, for our high coverage haploid genomes, to remove mapping errors and leave only real mutations, as only very few candidate mutations had to be rejected based on manual inspection and most mutations were unambiguous.

For genotyping SNPs in the strains sampled from natural populations, the above pipeline was used to call the genotypes. Other variants than SNPs were excluded. For a site to be included, it had to be polymorphic in the sample, with a mean read depth five or greater, genotype quality 30 or greater, and mapping quality 40 or greater across all samples. Then these same criteria were applied for each individual sample, and if a sample failed to meet the quality filters, its genotype was recorded as missing data. Heterozygous sites were excluded. Sites were also excluded if > 90% of samples had missing data. Sites were called as monomorphic if the mean reference genotype quality was 30 or greater and read depth 5 or greater across all samples. Then these same criteria were applied to individual samples, genotypes were recorded as missing data if a sample did not pass the filters.

### **Genotyping structural variants**

There are several algorithms available to detect structural variants (SVs) from short-read sequencing data. However, because this kind of data is prone to base calling and alignment errors, none of the available computational algorithms can accurately and sensitively detect all types and sizes

of SVs (Kosugi et al., 2019). To overcome this limitation it is common to use several algorithms and merge their outputs to increase sensitivity and precision. First, we assessed the performance of four different SVs algorithms (DELLY, Lumpy, PINDEL and SVaba) using simulated data.

We evaluated the performance of different SV callers on simulated data created using SURVIVOR version 1.0.7 (Jeffares et al., 2017). SURVIVOR simulates SVs by first modifying a fasta reference file by randomly altering locations according to given parameters of length and number of different SVs types (insertions, deletions, duplications, inversions and translocations). Reads are simulated based on the modified fasta and SVs are detected using the preferred SV caller. Finally SURVIVOR compares the SVs detected against the known simulated SVs, based on this FDR and sensitivity can be calculated.

We simulated four sets with 18, 40, 50 and 120 structural variants with a mutation rate of 0.001 on the reference genome (assembly NC12). The number of each type of SV simulated in each set is presented in the table S6. In set number four we simulated 20 complex SVs in which inversions and deletions occur in the same location. For duplications the min and max length parameter was set to 100-1000 bp, for INDELs 20-500 bp, for translocations 1000-3000 bp and for inversions 600-800 bp.

The SV length distribution across our four simulated sets were very similar (Figure S23), and the distribution coincides with ones reported in the literature, which indicates that short SVs are more common than large ones (Jeffares et al., 2017). The number of reads, the error rate and the coverage of the simulated data represent our sequenced reads. The inflated number of SV per genome is for testing purposes.

Based on the modified fasta we created 150 bp pair end reads with an error rate of 0.003% and a mean coverage of 30X using DWGSIM version 0.1.11 (Homer, 2021). Simulated reads were then aligned to the reference genome using BWA-MEM (Li, 2013) with default parameters, and SVs were called using DELLY version 0.8.7, LUMPY version 0.2.13, PINDEL version 0.2.5b9 and SVaba version 1.1.0 (Rausch et al., 2012; Layer et al., 2014; Ye et al., 2009; Wala et al., 2018). Finally, we used SURVIVOR to evaluate the performance of each SV caller. The SV calls

were considered correct if the simulated and detected SVs were 1) of the same type 2) on same chromosome and 3) both start and stop locations were within 50 bp. The callers that performed the best were DELLY and LUMPY as they showed high sensitivity score and low false discovery rate (FDR) score (Table S6), and they were selected to call SVs on the MA lines.

For calling SVs in the MA lines we first aligned the reads to the reference genome using BWA-MEM, excluded duplicated reads with SAMBLASTER version 0.1.26 (Faust and Hall, 2014), and extracted the discordant paired-end and split-read alignments using SAMTOOLS version 1.9 (Danecek et al., 2021). DELLY was used as indicated in the recommended workflow (Rausch et al., 2012). For LUMPY the read and insert lengths were extracted from alignment files using SAMTOOLS and the SVs were genotyped using SVTyper version 0.7.1 (Chiang et al., 2015). To filter out SVs that were present in the ancestor we used SnpSift version 5.0e (Cingolani et al., 2012). We removed those calls with a genotype quality score lower than 30 and read depth below 10. The analysis with both callers were carried out in somatic-germline mode, considering MA line as somatic and the ancestor as the germline. The signature of a translocation are reads with discordant mate pairs, where both mates are consistently mapped to other chromosomes for example. Translocation length was determined from the break points of these discordant reads. All of the SVs detected by each caller were manually verified by inspecting the alignment files in IGV.

### **Genotyping copy number variants**

To evaluate the performance of copy number variant (CNV) detection algorithms, we simulated 32 CNVs using SECNVs version 2.7.1 (Xing et al., 2020), then simulated 150 bp paired end reads with an error rate of 0.03% and a mean coverage of 30X using DWGSIM. We scanned for copy number variants (CNVs) using two detection programs, CNVnator version 0.4.1 (Abyzov et al., 2011) and CNV-seq version 0.2-7 (Xie and Tammi, 2009). CNV-seq was used with default parameters while CNVnator was used with two different bin sizes, 75 and 1670. Bins of 75 bp allowed the detection of small events, while bins of 1670 bp, which is the average gene length of *N. crassa* (Galagan et al., 2003), allowed the detection larger-scale events. Both callers together performed better than

any of the callers individually by showing the lowest FDR rate score of 0.482, and good sensitivity score of 0.906 (Table S7).

For genotyping CNVs in the MA lines we excluded MA line sites if the start or stop location of these were within 500 bp of any site detected in the ancestor. Also, we only retained the sites that were detected by both callers CNVnator and CNVseq (if 1000 bp or less overlapped at the start or end location). The remaining sites were manually verified by inspecting the alignment file in IGV. However, we did not find any evidence of copy number changes in the MA lines.

### **Chromatin modifications**

To determine regions of the genome where chromatin modifications occur, ChIP-seq reads for H3K9me3, H3K27me3, and H3K36me2 were aligned to the reference genome using BWA-MEM, and duplicate reads were removed by Picard tools. Domains of chromatin modifications were identified using RSEG 0.4.9 (Song and Smith, 2011). Data for centromeric regions were obtained from Smith et al. (2011) and coordinate corrections for NC12 from Wang et al. (2020). The centromeric regions were defined based on the presence of centromeric histone 3 variant: CENPA. Smith et al. (2011) collected ChIP-seq data against CENPA and other centromeric proteins. Centromeric sequences in *N. crassa* are composed of AT-rich sequences of degraded transposable elements. However, the repeat arrays are heterogenous due to action of RIP, making almost all sequence sufficiently unique to be able to map short reads to the genome (Smith et al., 2011).

Furthermore, we used the data of the duplicated regions that were defined by Wang et al. (2020). Wang et al. (2020) identified duplicated regions using BLAST, with the criteria of at least 100 bp alignment length and at least 65% sequence identity.

### **Analysis of relative mutation rate for different classes**

For cases where the relative mutation rates were computed for different classes of mutations the model was:

$$y_i \sim \text{Poisson}(\lambda_i) \quad (\text{S9})$$

$$\log(\lambda_i) = \log \tau_j + \alpha_{[j]}$$

$$\alpha_{[j]} \sim \text{N}(0, 10)$$

1032 where  $\tau_j$  is an offset term for class  $j$  that allows taking into account differences in the abundance  
 1033 of certain classes (McElreath, 2015), such as higher frequency of A's and T's than G's and C's in  
 1034 the genome. Priors for different predictors remained the same as in equation 1. Furthermore, if  
 1035 we calculate the expected number of mutations for different classes under the assumption that all  
 1036 mutations in all classes are equally likely, as  $\tau_j = f_j n$ , where  $f_j$  is the frequency of class  $j$  and  
 1037  $n$  is the total number of observed mutations, and use  $\tau_j$ , the expected number of mutations, as the  
 1038 offset parameter, then  $\exp(\alpha_{[j]})$  yields the relative mutation rate of class  $j$ . Since all estimates for  
 1039 different classes come from the same model, they are simultaneous comparisons in the statistical  
 1040 sense.

#### 1041 **Mutation rate variation across the genome**

1042 To model the effects of epigenetic domains and GC-content on mutation rate we used the following  
 1043 model:

$$y_i \sim \text{Poisson}(\lambda_i) \quad (\text{S10})$$

$$\log(\lambda_i) = \log \tau_i + \alpha + \beta_{GC}x_i + \beta_{K9}d_i + \beta_{K27}g_i + \beta_Cc_i + \beta_Ix_id_i$$

$$\alpha, \beta \sim \text{N}(0, 10)$$

1044 where  $y_i$  is the number of mutations a class of  $i$  intervals contained,  $\tau_i$  is the number of class  $i$  inter-  
 1045 vals in total,  $x_i$  the GC-content of those intervals,  $d_i$  indicates presence or absence of H3K9me3,  $g_i$   
 1046 indicates presence or absence of H3K27me3, and  $c_i$  indicates presence or absence of centromeric  
 1047 region.  $\beta$  coefficients are the corresponding effects and  $\alpha$  is the intercept.

1048 Model selection was a combination of biological and statistical reasoning, and we tested mod-  
 1049 els representing plausible biological hypotheses. For instance, we had a clear biological reason to  
 1050 expect that GC-content influences mutation rate, and we saw a large improvement in model pre-  
 1051 dictions when GC-content was included in the model. Therefore we did not further test models  
 1052 without GC-content and with different combinations of other terms. Furthermore, the only bio-  
 1053 logically realistic interactions are those involving GC-content and one of the domains. There are  
 1054 no regions where H3K27me3 and centromeric regions overlap, or regions where H3K9me3 and  
 1055 centromeric regions do not overlap, hence statistical interactions between domains are not possible  
 1056 in our data. Tested models are shown in Table S2, model comparisons were done using the widely  
 1057 applicable information criterion (WAIC) (McElreath, 2015; Vehtari et al., 2017).

1058 When we assessed how well did the mutation model predict the natural genetic variation we  
 1059 used the predicted mutation rates from model S10 as a response and  $\theta_W$  calculated from a popula-  
 1060 tion sample of strains as a predictor in a simple regression model. Bayesian version of  $R^2$  (Gelman  
 1061 et al., 2019) was used to assess the model fit.

1062 We could not asses the effect of duplicated regions defined by Wang et al. (2020) independently  
 1063 of H3K9me3 regions. Nearly all duplicated regions overlapped with H3K9me3 regions (Figure  
 1064 2). Those regions that were marked as duplicates, but which did not overlap with H3K9me3 or  
 1065 H3K27me3, contained mainly mutations in microsatellite repeats. Only 10 point mutations were  
 1066 observed in these regions, which was not enough to obtain reasonable estimates of independent  
 1067 effect of duplicated regions on mutation rate. Of those 10 point mutations, 3 were C:G  $\rightarrow$  T:A tran-  
 1068 sitions. As C  $\rightarrow$  T transitions were not over-represented, action of RIP is unlikely to be responsible  
 1069 for these mutations, which is expected as RIP is active only during meiosis.

## 1070 **Effects of local sequence context**

1071 To analyze effects of local base composition on the mutation rate, we estimated the effects of the  
1072 trinucleotides from a model that included the effects of the epigenetic domains. First, we extracted  
1073 the adjacent basepairs for every point mutation. There are 64 different trinucleotides, but as we  
1074 cannot know in which strand the mutation originally occurred we grouped the trinucleotides into  
1075 32 different classes based on sequence complementarity. For example, trinucleotides ATA and TAT  
1076 are complementary and were grouped. Then we counted how many times a given trinucleotide  
1077 occurs in the genome in all three reading frames. Relative mutation rate was analyzed using the  
1078 following model:

$$\begin{aligned} y_i &\sim \text{Poisson}(\lambda_i) & (S11) \\ \log(\lambda_i) &= \log \tau_t + \beta_t x_{[t]} + \beta_{K9} d_t + \beta_{K27} g_t + \beta_C c_t \\ \beta &\sim N(0, 10) \end{aligned}$$

1079 We compared different linear models (Table S4) with the same reasoning as above. We did not  
1080 include an intercept in this model, as we wanted to obtain estimates for all trinucleotide classes,  
1081 and not set one class as the intercept against which the others are compared. This does not alter any  
1082 biological conclusions.

1083 We further investigated how the flanking base pairs influenced the relative mutation rates of  
1084 the trinucleotides. We extracted estimates of the relative mutation rates for the trinucleotides from  
1085 model S11, and used these as a response in a model where we predicted relative mutation rates with  
1086 the identities of the flanking base pairs and the mutating base. Since our estimates of the relative  
1087 mutation rates contain uncertainty, we included the estimated error of the relative mutation rates in  
1088 the model. The model was:

$$y_{obs,i} \sim N(y_{est,i}, y_{sd,i}) \quad (S12)$$

$$y_{est,i} \sim N(\mu_i, \sigma)$$

$$\mu_i = \alpha + \beta_b x_i + \beta_5 z_i + \beta_3 g_i + \beta_{I5} x_i z_i + \beta_{I3} x_i g_i$$

$$\alpha, \beta \sim N(0, 10)$$

$$\sigma \sim \text{hT}(3, 0, 10)$$

1089 where  $y_{obs,i}$  is the median of  $i$ th observed relative mutation rate,  $y_{sd,i}$  is the observed standard  
 1090 deviation of the  $i$ th relative mutation rate,  $y_{est,i}$  is the  $i$ th estimated relative mutation rate,  $\alpha$  is the  
 1091 intercept,  $\beta_b$  is the effect of C:G relative to A:T for the mutating base,  $\beta_5$  is the effect of C:G relative  
 1092 to A:T for the 5' flanking base pair,  $\beta_3$  is the effect of C:G relative to A:T for the 3' flanking base  
 1093 pair,  $\beta_{I5}$  is the interaction effect of 5' CG when the mutating base is C:G, and  $\beta_{I3}$  is the interaction  
 1094 effect of 3' C:G when the mutating base pair is C:G.  $x_i$ ,  $z_i$ , and  $g_i$  are indicators whether the basepair  
 1095 is C:G. We used the half location-scale version of Student's t-distribution as a prior for the standard  
 1096 deviation with 3 degree's of freedom, location 0, and scale 10.

## 1097 **Supplementary results**

### 1098 **Accuracy of mutation calling**

1099 Estimating mutation rates and particularly estimating differences in the mutation rate in different  
 1100 parts of the genome requires accurate mutation calls. As some regions of the genome, such as cen-  
 1101 tromeric regions, may contain repetitive sequences it is important to verify that the mutations are  
 1102 called accurately in all regions of the genome, and that no region has an excess of false positive mu-  
 1103 tations. First, we examined sequencing coverage throughout the genome, GC-content does have an  
 1104 effect on sequencing coverage as regions of low GC can be preferentially amplified during library  
 1105 construction, and we observed slight elevation on normalized coverage around 35% GC (Figure



1106 S13). However, overall we observed that sequencing coverage was rather uniform across regions  
1107 of different GC-content (Figure S13). Centromeric regions and regions marked by H3K9me3 have  
1108 low GC-content, and while we did observe that coverage went down in regions of  $< 15\%$  GC,  
1109 those regions constitute a very small fraction of the genome. Next, we explored the accuracy of our  
1110 mutation calls after the mutations had been called by our pipeline and manually inspected in IGV.  
1111 We observed that overwhelming majority of mutations had the highest possible genotype quality  
1112 score determined by the GATK pipeline (Figure S1). Median genotype quality for mutations was  
1113 the highest possible value of 99, and only 8.6% of mutations had genotype quality less than 80  
1114 and only 1.9% less than 50. Distribution of quality scores was similar in different regions of the  
1115 genome (Figure S1). While there was slightly more mutations that had lower quality scores than  
1116 99 in regions marked by H3K9me3 and in centromeric regions than in euchromatic regions (Figure  
1117 S1), overwhelming majority of mutations in those regions have the highest genotype quality score  
1118 of 99.

1119 If most of the mutations had genotype quality scores of 99, then what kind of confidence we  
1120 have in those mutation calls? We illustrate genotype quality scores with alignments viewed in  
1121 IGV that show mutations in different regions of the genome and different genotype quality scores  
1122 (Figure S14, S15, S16, S17, S18, S19, S20, S21, S22). When mutations had genotype quality  
1123 score of 99 they were unambiguous (Figure S14, S17, S20). When genotype qualities were around  
1124 70 mutations could still be distinguished from unambiguously, even if few reads did not support  
1125 the mutation or the mutations were in repetitive regions. When mutation genotype qualities were  
1126 around 45 this was usually a sign that the region had lower mapping quality due to repeats or  
1127 duplications (Figure S16, S19, S22). Despite of this, even in these regions, real mutations could  
1128 be distinguished from mapping errors by looking at which reads supported the mutation and which  
1129 did not (Figure S19, S22).

1130 We have also provided screenshots of the alignments showing mutations viewed in IGV for a  
1131 random sample of mutations. We selected mutations randomly, by first splitting the mutations into  
1132 three genomic domains: H3K9me3, centromeric, and euchromatic, then drew a random sample of

1133 30 from each pool, for a total of 90 mutations (see supplementary file S2). Information about the  
1134 sampled mutations can be found in supplementary file S1.

1135 The reason we chose first to do Sanger-verification for the mutations with the lowest genotype  
1136 qualities was because for mutations with genotype quality of 99, there was no doubt that these were  
1137 real mutations. We verified 23 base pair changes, of which 12 were in complex mutations and 11  
1138 as single nucleotide mutations. Of the 11 SNMs 5 were in regions marked by H3K9 (excluding  
1139 centromeres), 3 in centromeric regions, and 3 in euchromatin. Of the 12 base pair changes in complex  
1140 mutations, 3 mutations were in H3K9 regions (5 base changes in total), 1 mutation in centromeric  
1141 region (2 base pair changes), and 3 mutations in euchromatin (5 base pair changes). In the second  
1142 verification set we sequenced 15 randomly sampled mutations from each genomic region (euchro-  
1143 matin, H3K9me3, and centromeric). One mutation located in centromeric region failed to amplify  
1144 by PCR, the remaining 44 mutations were all confirmed. In summary, we confirmed point muta-  
1145 tions by Sanger sequencing in centromeric, H3K9me3, and euchromatic regions. We confirmed  
1146 all point mutations where PCR-amplification and Sanger sequencing were successful, so we never  
1147 detected a false positive point mutation.

1148 Why were the genotype qualities of the mutations so good in our experiment? There are several  
1149 factors in this study that contributed excellent genotype calls. First, the ancestors for the MA lines  
1150 were derived from line 2489 (synonym OR74a), which was the strain used for the original genome  
1151 project (Galagan et al., 2003). Therefore, the reference genome used for read mapping corresponds  
1152 to the genome of the MA line ancestors. This is seen in alignment metrics as 98% reads are mapped  
1153 to the genome in the ancestors and MA lines (Table S1). As such, there are likely not many reads  
1154 that would erroneously map to an incorrect location because their true source of origin was missing  
1155 from the reference genome. Second, as explained in the introduction, repetitive sequences tend  
1156 to diverge from each other in *N. crassa* due to the action of RIP. RIP does not induce the exact  
1157 same mutations to the duplications, so over time duplicated arrays, such as those often found in  
1158 centromeric regions, tend to diverge from one another, to the extent that short reads can be mapped  
1159 to the genome in regions where it is not often possible to the same extent in other species (Smith

1160 et al., 2011). Third, the small genome of *N. crassa* made it possible to sequence the samples to  
1161 a high depth, on average over 50x in many samples (Table S1). This allowed us to discriminate  
1162 between true mutations and mapping errors. With this kind of sequencing depth, sequencing errors  
1163 are simply not an issue anymore and they have no impact on calling the mutations, e.g. Figure S18  
1164 shows a mutation in repetitive region that as a consequence has higher frequency of sequencing  
1165 errors, but with so many reads identifying the real mutation is not a problem. Finally, *N. crassa*  
1166 is haploid. Combined with high sequencing depth, this makes identifying mutations easy. The  
1167 only important errors are read mapping errors that may cause some sites to appear as heterozy-  
1168 gous. But as heterozygous sites are not expected to occur in our experiment we can filter out sites  
1169 called as heterozygous. We did inspect heterozygous sites manually, as it is possible that some  
1170 mutations could have been present in a heterokaryotic state (nuclei with different genotypes in the  
1171 same mycelium). However, we did not find any evidence of true mutations in heterokaryotic state.  
1172 Whenever sites appeared as heterozygous, multiple sites were found close together (Figure S19),  
1173 indicating that read mapping errors were the more likely explanation. Because of these factors,  
1174 our study differs substantially from studies that need to call heterozygous sites from data with low  
1175 sequencing depth and the problem of calling genotypes correctly is of different nature.

1176 In summary, overwhelming majority of mutations that our pipeline detected had the highest  
1177 possible genotype quality of 99, and this was true in regions of the genome with potentially more  
1178 repetitive and duplicated regions like in centromeric regions and regions marked by H3K9 methy-  
1179 lation. Those mutations that had genotype quality of 99 were unambiguously real mutations. Thus,  
1180 even if we would filter out every mutation with genotype quality less than 99, we would still de-  
1181 tect the observed pattern that mutation rate was higher in regions marked by H3K9 trimethylation  
1182 and in centromeric regions. Differential mutation calling in different regions of the genome cannot  
1183 explain the observed results.

## 1184 **Simulating variation in mutation rate**

1185 Despite our very high genotype qualities, we attempted to further understand could repetitive se-  
1186 quences or other sequence features of heterochromatin in the *N. crassa* genome hinder our ability  
1187 to correctly estimate differences in mutation rates in different regions of the genome. We simulated  
1188 data under two different scenarios. First, we simulated a scenario where mutation rate was set to  
1189 be higher in H3K9me3 domains, with a rate of  $2 \times 10^{-5}$  mutations per site, compared to the rest  
1190 of the genome, with a rate of  $3 \times 10^{-6}$  mutations per site. In the second scenario, we simulated  
1191 a uniform mutation rate across the genome, with a rate of  $2 \times 10^{-6}$  mutations per site. We simu-  
1192 lated mutations to the *N. crassa* genome using the program Mutation-Simulator (Kühl et al., 2021).  
1193 We simulated 40 different MA lines for each scenario with a transition / transversion rate of 1.08.  
1194 We then generated simulated reads from these simulated genomes, using DWGSM (Homer, 2021),  
1195 with 30X sequencing depth and read length of 150 bp. We tried to imitate the conditions of our real  
1196 sequenced data, so we set the standard deviation of the base quality scores to two and the per base  
1197 sequencing error rate to 0.003. The ancestor of the MA lines was simulated by generating reads  
1198 from the reference genome of *N. crassa*. To call the simulated mutations from the simulated reads,  
1199 we ran the same pipeline as we used for the experimental data. Thus, we had two simulated scenar-  
1200 ios, and for each scenario we had information about the true number of mutations that happened in  
1201 the simulation, and number of mutations we called with our pipeline from the simulated read data.

1202 In the scenario with the higher mutation rate in H3K9me3 regions, we ended up with a total of  
1203 1759 mutations, of which 719 were in H3K9me3 domains, 990 in euchromatin, and 50 in unspecific  
1204 domains. With our pipeline we detected a total of 1705 mutations, of which 692 were in H3K9me3  
1205 domains, 964 in euchromatin and 49 in unspecific domains. All of the called mutations were true  
1206 positives. However, we failed to call 54 true mutations, that is, these were false negatives. In a  
1207 similar manner, in the scenario with the uniform mutation rate, we ended up with a total of 3078  
1208 mutations, of which 562 were in H3K9me3 domains, 2245 in euchromatin, and 271 in unspecific  
1209 domains. Our pipeline detected 2978 mutations in total, of which 535 were in H3K9 domains, 2177  
1210 in euchromatin, and 266 in unspecific domains. Again, there were no false positive calls. We failed

1211 to detect 100 mutations in this set. In general, the number of false negatives was higher in H3K9me3  
1212 regions, with proportion of false negatives 3.75% and 4.80% in H3K9me3 regions, and 2.62% and  
1213 3.02% in euchromatin in for the different and uniform mutation rate scenarios respectively.

1214 We found that the estimated mutation rate was higher in H3K9me3 regions in the scenario where  
1215 the true mutation rate was higher in H3K9me3 (Figure S2), the mutation rate ratio of H3K9me3  
1216 / euchromatin was 3.39 [3.06, 3.72]. This mutation rate ratio was not statistically different from  
1217 the one calculated from the true simulated mutations: the difference was 0.28 [-0.15, 0.74], which  
1218 includes zero in the interval estimate. Furthermore, when we simulated a uniform mutation rate  
1219 across the genome, we found no difference among called and true datasets (Figure S2). The muta-  
1220 tion rate ratio of H3K9me3 / euchromatin was 1.15 [1.05, 1.27], there was no statistical difference  
1221 in the rate ratios between called and true simulated mutations: difference was 0.08 [-0.05, 0.23],  
1222 which includes zero in the interval estimate.

1223 With this simulation data we show that our pipeline can confidently detect a difference in mu-  
1224 tation rates in different regions of the genome. This shows that sequence features of the H3K9me3  
1225 regions, such as repetitive sequences, do not interfere with mutation calling in a manner that would  
1226 lead to gross biases in mutation rate estimates in the different domains. While simulated read data  
1227 cannot capture all of the properties of real data, because of sequences missing from the reference  
1228 or assembly errors, it does give us confidence that we will be able to detect a real difference in mu-  
1229 tation rates. Moreover, since we did not observe any false positive mutations, we are confident that  
1230 mutation calling cannot generate spurious results in our case. We did observe slightly higher pro-  
1231 portions of false negative mutations in H3K9me3 regions. However, if this bias is true for real data,  
1232 this would make our estimate of the elevated mutation rate in H3K9me3 regions more conservative.

### 1233 **Robustness of relationship between $\theta_W$ and predicted mutation rate**

1234 We wanted to evaluate the robustness of the observed relationship between  $\theta$  and the predicted  
1235 mutation rate. One potential issue is that there are windows in the genome, especially for small  
1236 window sizes, where the observed  $\theta$  is zero. Since zero is the minimum value that  $\theta$  can obtain, and

1237 there is a clumping of  $\theta = 0$  observations in the data, this violates the assumption that response is  
1238 gaussian and could lead to biased estimates. However, since there so many data points, the model  
1239 may be robust to observations where  $\theta = 0$ . First, we tested the effect of window size, calculating  
1240  $\theta$  over longer windows reduced the number of windows where  $\theta = 0$ . Increasing window size  
1241 slightly improves the amount of variation explained by the model (Figure S5). Thus, results are  
1242 robust the to different window sizes.

1243 Then we tested whether the results were robust to different models. Data that can take zero or  
1244 positive values, but is clumped at zero, can be modeled in different ways. One possibility is Tobit  
1245 regression. Tobit regression is a type of censored regression, where observations are assumed to  
1246 have an underlying gaussian distribution, but appear as zeros if  $y_i \leq 0$  (Min and Agresti, 2002).  
1247 We used a conventional Tobit regression and robust Tobit regression, for both cases the results  
1248 were very similar to an ordinary regression model (Figure S6). Then, we tested a log-normal  
1249 hurdle model. In this model the response distribution is a mixture of two processes, one models the  
1250 probability that the observation is larger then zero, and the other is a log-normal gaussian model  
1251 (Min and Agresti, 2002). For the hurdle model, we also observed that that the relationship between  
1252  $\theta$  and predicted mutation rate was positive (Figure S6). Therefore, our results are robust to the  
1253 clumping at zero phenomenon.

1254 Next, we tested whether the action of RIP could explain the relationship between  $\theta$  and pre-  
1255 dicted mutation rate. If level of genetic diversity is very high in H3K9me3 regions due to C  $\rightarrow$  T  
1256 transitions induced by RIP, we want to make sure that this phenomenon does not solely cause the  
1257 relationship between  $\theta$  and predicted mutation rate. We cannot determine the exact contribution of  
1258 RIP to genetic diversity, because we do not know the ancestral states of the SNPs and therefore can-  
1259 not distinguish between C:G  $\rightarrow$  T:A and A:T  $\rightarrow$  G:C transitions. Furthermore, we would need to  
1260 know the population recombination rate to estimate the number of meiotic divisions for every mito-  
1261 sis and thus the frequency of RIP. Therefore, we looked at the relationship between  $\theta$  and predicted  
1262 mutation rate within each of the genomic domains, and observed a positive relationship between  $\theta$   
1263 and predicted mutation rate within each of the domains. Although, the effect was weak within cen-

1264 tromeric domains (Figure S7A). We then filtered the SNP dataset to include only transversions and  
1265 calculated  $\theta$  across the genome. There was a positive relationship between  $\theta$  for transversions only  
1266 and the predicted mutation rate within all domains except H3K9me3 (Figure S7B). These results  
1267 show that while RIP probably has a large contribution to genetic diversity in regions of H3K9me3,  
1268 it does not solely drive the relationship between  $\theta$  and predicted mutation rate.

### 1269 **Re-analysis of data from Wang et al. 2020**

1270 Wang et al. (2020) estimated the rate of spontaneous mutation during meiosis in *N. crassa*. During  
1271 meiosis a genome defence mechanism called repeat-induced point mutation (RIP) induces mainly  
1272 C  $\rightarrow$  T transitions in duplicated regions of the genome resulting in a very high overall mutation  
1273 rate (Wang et al., 2020). While not made explicit by Wang et al. (2020), the duplicated regions  
1274 correspond almost completely to the H3K9 trimethylated domains. In order to better compare our  
1275 results for asexual mutation rate in different domains to the sexual mutation rate estimated in their  
1276 study, we re-analyzed the data from Wang et al. (2020) provided in their supplementary material,  
1277 and included the information about chromatin domains. Their data are comprised of mutations in  
1278 sequenced tetrads, which correspond to the products of a single meiosis. We included only those  
1279 tetrads originating from crosses between non-mutant strains. This leaves 67 tetrads in the data that  
1280 originate from five different crosses.

1281 First we split the mutations to those that occurred in euchromatin and to those that occurred in  
1282 H3K9 trimethylated domains. We observed that the numbers of mutations occurring in euchromatin  
1283 and H3K9me3 domains for a given tetrad had very different distributions (Figure S11A), number of  
1284 mutations occurring per tetrad in the H3K9me3 domains had a very long tail. When we examined  
1285 the number of mutations per tetrad by cross, we observed a median of 22 mutations that occurred  
1286 in euchromatic regions per tetrad, with some differences among the five crosses. However, the  
1287 variation among tetrads from the different crosses was similar (Figure S11B). However, there were  
1288 a median of 38 mutations that occurred in the H3K9me3 domains per tetrad, but a huge variation  
1289 among tetrads, even within tetrads from a single cross (Figure S11B). For example, some tetrads

1290 from the same cross had 20 to 40 mutations, while others could have hundreds. In cross E the  
 1291 range of mutations was from 27 in one tetrad to 1187 in another. Variation among mutations in the  
 1292 H3K9me3 domains per tetrad suggest that while there probably were some genetic influences on  
 1293 the mutation rate in the different crosses, there was substantial heterogeneity in the activation of  
 1294 RIP that was independent of genetic effects.

1295 We calculated the mutation rate per meiosis for the euchromatic regions of the genome using a  
 1296 multilevel model with cross as a random factor. The model was

$$\begin{aligned}
 y_i &\sim \text{Poisson}(\lambda_i) & (S13) \\
 \log(\lambda_i) &= \bar{\alpha} + \alpha_{c[i]} \\
 \bar{\alpha} &\sim N(0, 10) \\
 \alpha_c &\sim N(0, \sigma_c) \\
 \sigma_c &\sim \text{hT}(3, 0, 10)
 \end{aligned}$$

1297 where  $y_i$  is the number of mutations in euchromatic regions in the  $i$ th tetrad,  $\bar{\alpha}$  is the average inter-  
 1298 cept,  $\alpha_c$  is deviation from average intercept for each cross, and  $\sigma_c$  is the cross standard deviation.  
 1299 Prior for  $\sigma_c$  was the half-location scale version of Student's t-distribution, with 3 degrees of free-  
 1300 dom, location 0, and scale 10. Based on posterior predictive checks, this model fitted the data.  
 1301 Mutation rate was calculated from posterior distribution of  $\bar{\alpha}$  as

$$\mu = \frac{\exp(\bar{\alpha})}{Nn_t} \quad (S14)$$

1303 where  $N$  is the number of called nucleotides, and  $n_t$  is the number of tetrads. The mutation rate in  
 1304 euchromatic regions during sexual reproduction was  $1.07 [0.6, 1.67] \times 10^{-8}$  mutations / meiosis /  
 1305 bp.

1306 The data for mutations that occurred in the H3K9me3 domains are clearly overdispersed. To



1307 calculate the mutation rate per meiosis for the H3K9me3 domains we also modelled the heterogene-  
 1308 ity among the tetrads. We fitted a gamma-poisson model, also called a negative binomial model, to  
 1309 the data. A gamma-poisson model allows each observation, a tetrad in our case, to have a different  
 1310 poisson rate allowing us to model this heterogeneity in observed rates (McElreath, 2015). We fitted  
 1311 a model

$$\begin{aligned}
 y_i &\sim \text{Gamma-Poisson}(\lambda_i, \phi) & (\text{S15}) \\
 \log(\lambda_i) &= \bar{\alpha} + \alpha_{c[i]} \\
 \bar{\alpha} &\sim \text{N}(0, 10) \\
 \alpha_c &\sim \text{N}(0, \sigma_c) \\
 \sigma_c &\sim \text{hT}(3, 0, 10) \\
 \phi &\sim \Gamma(0.01, 0.01)
 \end{aligned}$$

1312 where  $y_i$  is the number of mutations in the H3K9me3 domains in the  $i$ th tetrad,  $\phi$  is the dispersion  
 1313 parameter, and other parameters were same as above. The prior for  $\phi$  was a gamma distribution  
 1314 with shape of 0.01 and scale 0.01. Posterior predictive check indicated that the model fit the data  
 1315 reasonably well. The mutation rate was calculated from the average intercept as above. The muta-  
 1316 tion rate in H3K9 trimethylated regions during sexual reproduction was  $2.54 [0.11, 7.55] \times 10^{-7}$   
 1317 mutations / meiosis / bp. As a result of rate heterogeneity there is quite a bit of uncertainty in the  
 1318 estimate. The ratio of mutation rates in the H3K9me3 regions over the euchromatic regions was  
 1319 23.7 [0.99, 76.38]. While the 95% interval of the ratio slightly overlaps one due to large uncertainty  
 1320 in mutation rate in the H3K9me3 regions, mutation rate those regions seems higher.

1321 We examined the spectrum of mutations that occurred in the euchromatic and the H3K9me3 re-  
 1322 gions separately, in the same way we did for asexual mutations. We observed that in the H3K9me3  
 1323 regions there was a substantial over-representation of C:G  $\rightarrow$  T:A transitions due to the action of  
 1324 RIP (Figure S11C). However, the mutation spectra that occurred in euchromatic regions was much

more similar to the one we observed during asexual reproduction in euchromatic regions. There was no difference in the relative mutation rate of C:G → T:A transitions during sexual and asexual reproduction in euchromatic regions. Some of the transversions did have different relative rates: A:T → C:G, and C:G → G:C transversions had higher rate during sexual reproduction, while C:G → A:T transversions had a lower relative mutation rate during sexual reproduction (Figure S12).

Our analysis gives somewhat different results compared to those of Wang et al. (2020), who only calculated mutation rates across the whole genome, and did not take variation among tetrads or crosses into account. We do find higher mutation rates during sexual reproduction than during asexual reproduction, suggesting that in *N. crassa* meiosis is mutagenic in addition to the RIP effect in the H3K9me3 domains. However, the mutation rate per meiosis was much smaller than that estimated by Wang et al. (2020). The H3K9 trimethylated regions contain mainly degraded transposable elements, and are quite gene poor. If we compare non-synonymous mutations in euchromatic and H3K9me3 regions, of those mutations that occurred in euchromatic regions 22.16% were non-synonymous, while only 0.17% of mutations were non-synonymous in H3K9 methylated regions. Thus, the very high mutation rate observed in H3K9 regions due to action of RIP, does not necessarily translate into a high genetic load. We suggest that the mutation load during sexual reproduction in *N. crassa* may not be as high as it has been suggested by Wang et al. (2020).

## Supplementary References

Abyzov, A., Urban, A. E., Snyder, M., and Gerstein, M., 2011. CNVnator: An approach to discover, genotype, and characterize typical and atypical CNVs from family and population genome sequencing. *Genome Research*, **21**(6):974–984.

Chiang, C., Layer, R. M., Faust, G. G., Lindberg, M. R., Rose, D. B., Garrison, E. P., Marth, G. T., Quinlan, A. R., and Hall, I. M., 2015. Speedseq: ultra-fast personal genome analysis and interpretation. *Nature Methods*, **12**(10):966–968.

Cingolani, P., Platts, A., Coon, M., Nguyen, T., Wang, L., Land, S., Lu, X., and Ruden, D., 2012. A

program for annotating and predicting the effects of single nucleotide polymorphisms, SnpEff: SNPs in the genome of *Drosophila melanogaster* strain w1118; iso-2; iso-3. *Fly*, **6**(2):80–92.

Danecek, P., Bonfield, J. K., Liddle, J., Marshall, J., Ohan, V., Pollard, M. O., Whitwham, A., Keane, T., McCarthy, S. A., Davies, R. M., *et al.*, 2021. Twelve years of SAMtools and BCFtools. *GigaScience*, **10**(2). giab008.

Davis, R. H. and de Serres, F. J., 1970. Genetic and microbiological research techniques for *Neurospora crassa*. *Methods in Enzymology*, **17**:79–143.

Faust, G. G. and Hall, I. M., 2014. SAMBLASTER: fast duplicate marking and structural variant read extraction. *Bioinformatics*, **30**(17):2503–2505.

Freitag, M., Hickey, P. C., Raju, N. B., Selker, E. U., and Read, N. D., 2004. GFP as a tool to analyze the organization, dynamics and function of nuclei and microtubules in *Neurospora crassa*. *Fungal Genetics and Biology*, **41**(10):897–910.

Galagan, J. E., Calvo, S. E., Borkovich, K. A., Selker, E. U., Read, N. D., Jaffe, D., FitzHugh, W., Ma, L.-J., Smirnov, S., Purcell, S., *et al.*, 2003. The genome sequence of the filamentous fungus *Neurospora crassa*. *Nature*, **422**(6934):859–868.

Gelman, A., Goodrich, B., Gabry, J., and Vehtari, A., 2019. R-squared for Bayesian regression models. *The American Statistician*, **73**(3):307–309.

Homer, N., 2021. DWGSIM: Whole genome simulator for next-generation sequencing. github repository.

Jeffares, D. C., Jolly, C., Hoti, M., Speed, D., Shaw, L., Rallis, C., Balloux, F., Dessimoz, C., Bähler, J., and Sedlazeck, F. J., *et al.*, 2017. Transient structural variations have strong effects on quantitative traits and reproductive isolation in fission yeast. *Nature Communications*, **8**:14061.

Kelleher, J., Ness, R. W., and Halligan, D. L., 2013. Processing genome scale tabular data with wormtable. *BMC Bioinformatics*, **14**(1):1–5.

1374 Kosugi, S., Momozawa, Y., Liu, X., Terao, C., Kubo, M., and Kamatani, Y., 2019. Comprehensive  
 1375 evaluation of structural variation detection algorithms for whole genome sequencing. *Genome*  
 1376 *Biology*, **20**(1):117.

1377 Kronholm, I., Ormsby, T., McNaught, K. J., Selker, E. U., and Ketola, T., 2020. Marked *Neurospora*  
 1378 *crassa* strains for competition experiments and Bayesian methods for fitness estimates. *G3:*  
 1379 *Genes|Genomes|Genetics*, **10**:1261–1270.

1380 Köhl, M., Stich, B., and Ries, D., 2021. Mutation-Simulator: fine-grained simulation of random  
 1381 mutations in any genome. *Bioinformatics*, **37**(4):568–569.

1382 Layer, R. M., Chiang, C., Quinlan, A. R., and Hall, I. M., 2014. LUMPY: a probabilistic framework  
 1383 for structural variant discovery. *Genome Biology*, **15**(6):R84.

1384 Li, H., 2013. Aligning sequence reads, clone sequences and assembly contigs with BWA-MEM.  
 1385 *arXiv:1303.3997 [q-bio.GN]*, .

1386 Lichius, A. and Zeilinger, S., 2019. Application of membrane and cell wall selective fluorescent  
 1387 dyes for live-cell imaging of filamentous fungi. *JoVE*, (153):e60613.

1388 McElreath, R., 2015. *Statistical Rethinking - A Bayesian course with examples in R and Stan*. CRC  
 1389 Press, New York.

1390 McKenna, A., Hanna, M., Banks, E., Sivachenko, A., Cibulskis, K., Kernytsky, A., Garimella, K.,  
 1391 Altshuler, D., Gabriel, S., Daly, M., *et al.*, 2010. The Genome Analysis Toolkit: a MapReduce  
 1392 framework for analyzing next-generation DNA sequencing data. *Genome Research*, **20**(9):1297–  
 1393 1303.

1394 Metzenberg, R. L., 2003. Vogel’s medium N salts: Avoiding the need for ammonium nitrate.  
 1395 *Fungal Genetics Newsletter*, **50**:14.

1396 Min, Y. and Agresti, A. a., 2002. Modeling nonnegative data with clumping at zero: A survey.  
 1397 *JIRSS*, **1**(1):7–33.

1398 Rausch, T., Zichner, T., Schlattl, A., Stütz, A. M., Benes, V., and Korbel, J. O., 2012. DELLY:  
1399 structural variant discovery by integrated paired-end and split-read analysis. *Bioinformatics*,  
1400 **28**(18):i333–i339.

1401 Rueden, C. T., Schindelin, J., Hiner, M. C., DeZonia, B. E., Walter, A. E., Arena, E. T., and  
1402 Eliceiri, K. W., 2017. ImageJ2: ImageJ for the next generation of scientific image data. *BMC*  
1403 *Bioinformatics*, **18**(1):529.

1404 Schindelin, J., Arganda-Carreras, I., Frise, E., Kaynig, V., Longair, M., Pietzsch, T., Preibisch, S.,  
1405 Rueden, C., Saalfeld, S., Schmid, B., *et al.*, 2012. Fiji: an open-source platform for biological-  
1406 image analysis. *Nature Methods*, **9**(7):676–682.

1407 Smith, K. M., Phatale, P. A., Sullivan, C. M., Pomraning, K. R., and Freitag, M., 2011. Heterochro-  
1408 matin is required for normal distribution of *Neurospora crassa* CenH3. *Molecular and Cellular*  
1409 *Biology*, **31**(12):2528–2542.

1410 Song, Q. and Smith, A. D., 2011. Identifying dispersed epigenomic domains from ChIP-Seq data.  
1411 *Bioinformatics*, **27**(6):870–871.

1412 Thorvaldsdóttir, H., Robinson, J. T., and Mesirov, J. P., 2013. Integrative Genomics Viewer (IGV):  
1413 high-performance genomics data visualization and exploration. *Briefings in Bioinformatics*,  
1414 **14**(2):178–192.

1415 Vehtari, A., Gelman, A., and Gabry, J., 2017. Practical Bayesian model evaluation using leave-one-  
1416 out cross-validation and WAIC. *Statistics and Computing*, **27**(5):1413–1432.

1417 Wala, J. A., Bandopadhyay, P., Greenwald, N. F., O’Rourke, R., Sharpe, T., Stewart, C., Schu-  
1418 macher, S., Li, Y., Weischenfeldt, J., Yao, X., *et al.*, 2018. SvABa: genome-wide detection of  
1419 structural variants and indels by local assembly. *Genome Research*, **28**(4):581–591.

1420 Wang, L., Sun, Y., Sun, X., Yu, L., Xue, L., He, Z., Huang, J., Tian, D., Hurst, L. D., and Yang,  
1421 S., *et al.*, 2020. Repeat-induced point mutation in *Neurospora crassa* causes the highest known  
1422 mutation rate and mutational burden of any cellular life. *Genome Biology*, **21**(1):142.

- 1423 Xie, C. and Tammi, M. T., 2009. CNV-seq, a new method to detect copy number variation using  
1424 high-throughput sequencing. *BMC Bioinformatics*, **10**(1):80.
- 1425 Xing, Y., Dabney, A. R., Li, X., Wang, G., Gill, C. A., and Casola, C., 2020. SECNVs: a simulator  
1426 of copy number variants and whole-exome sequences from reference genomes. *Frontiers in*  
1427 *Genetics*, **11**:82.
- 1428 Ye, K., Schulz, M. H., Long, Q., Apweiler, R., and Ning, Z., 2009. Pindel: a pattern growth  
1429 approach to detect break points of large deletions and medium sized insertions from paired-end  
1430 short reads. *Bioinformatics*, **25**(21):2865–2871.

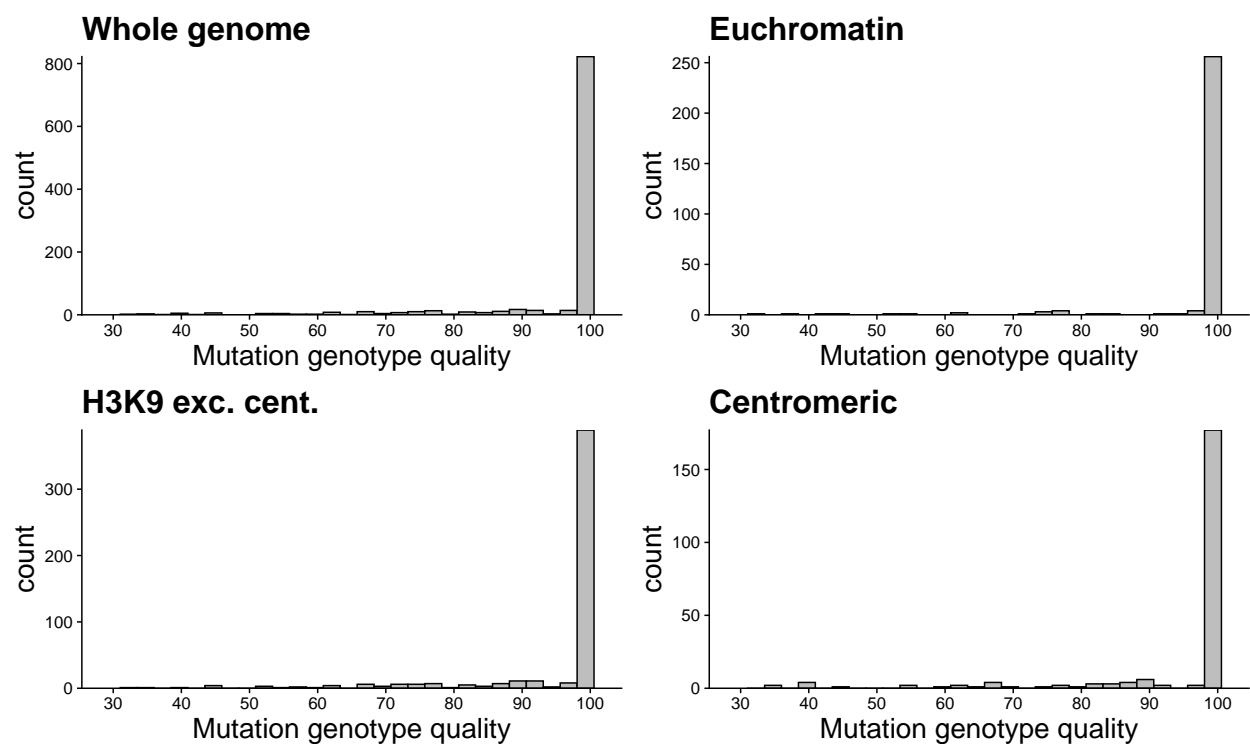

Figure S1: Distribution of genotype qualities of observed mutations given by GATK. Distributions are shown for the whole genome, euchromatin, H3K9me3 domains excluding centromeric regions, and centromeric regions.

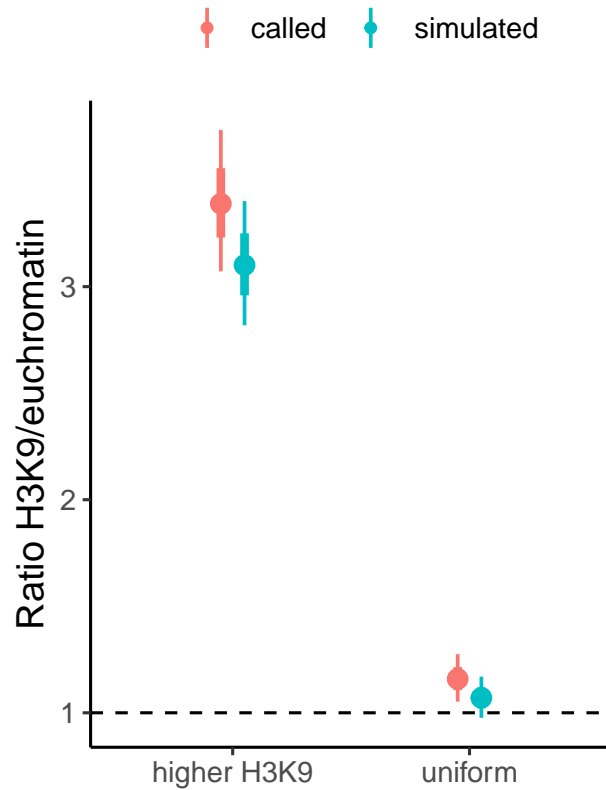

Figure S2: H3K9me3 / euchromatin mutation rate ratio in the simulated data. Estimates calculated from called mutations from the simulated reads are in red, and estimates calculated using the true simulated mutations are in blue. The two different scenarios are: mutation rate was higher in regions of the genome marked by H3K9me3, and mutation rate was uniform across the genome. Points are means and range shows the 95% HPD interval of the ratio. Interval estimates overlap in both scenarios.



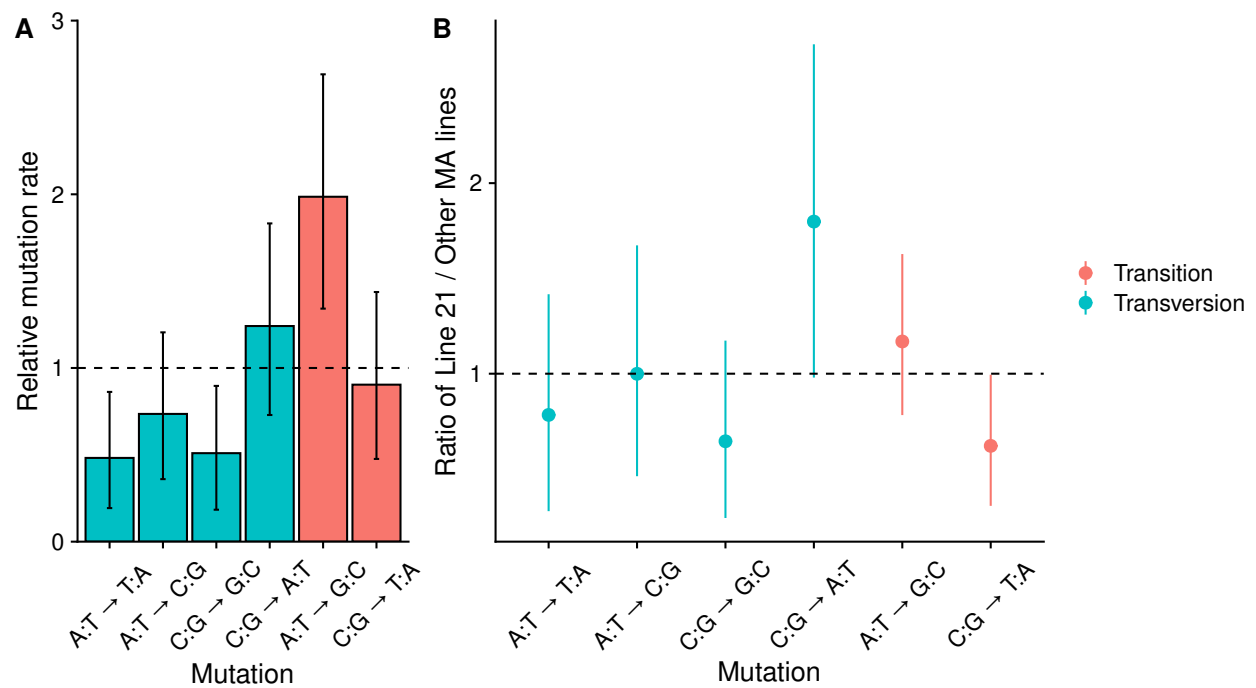

Figure S3: Mutation spectra for the MA line 21. A) Relative mutation rates. B) Ratios of relative mutation rates for line 21 / rest of the MA lines. Intervals for C:G → A:T transversions and C:G → T:A transitions barely overlap one.

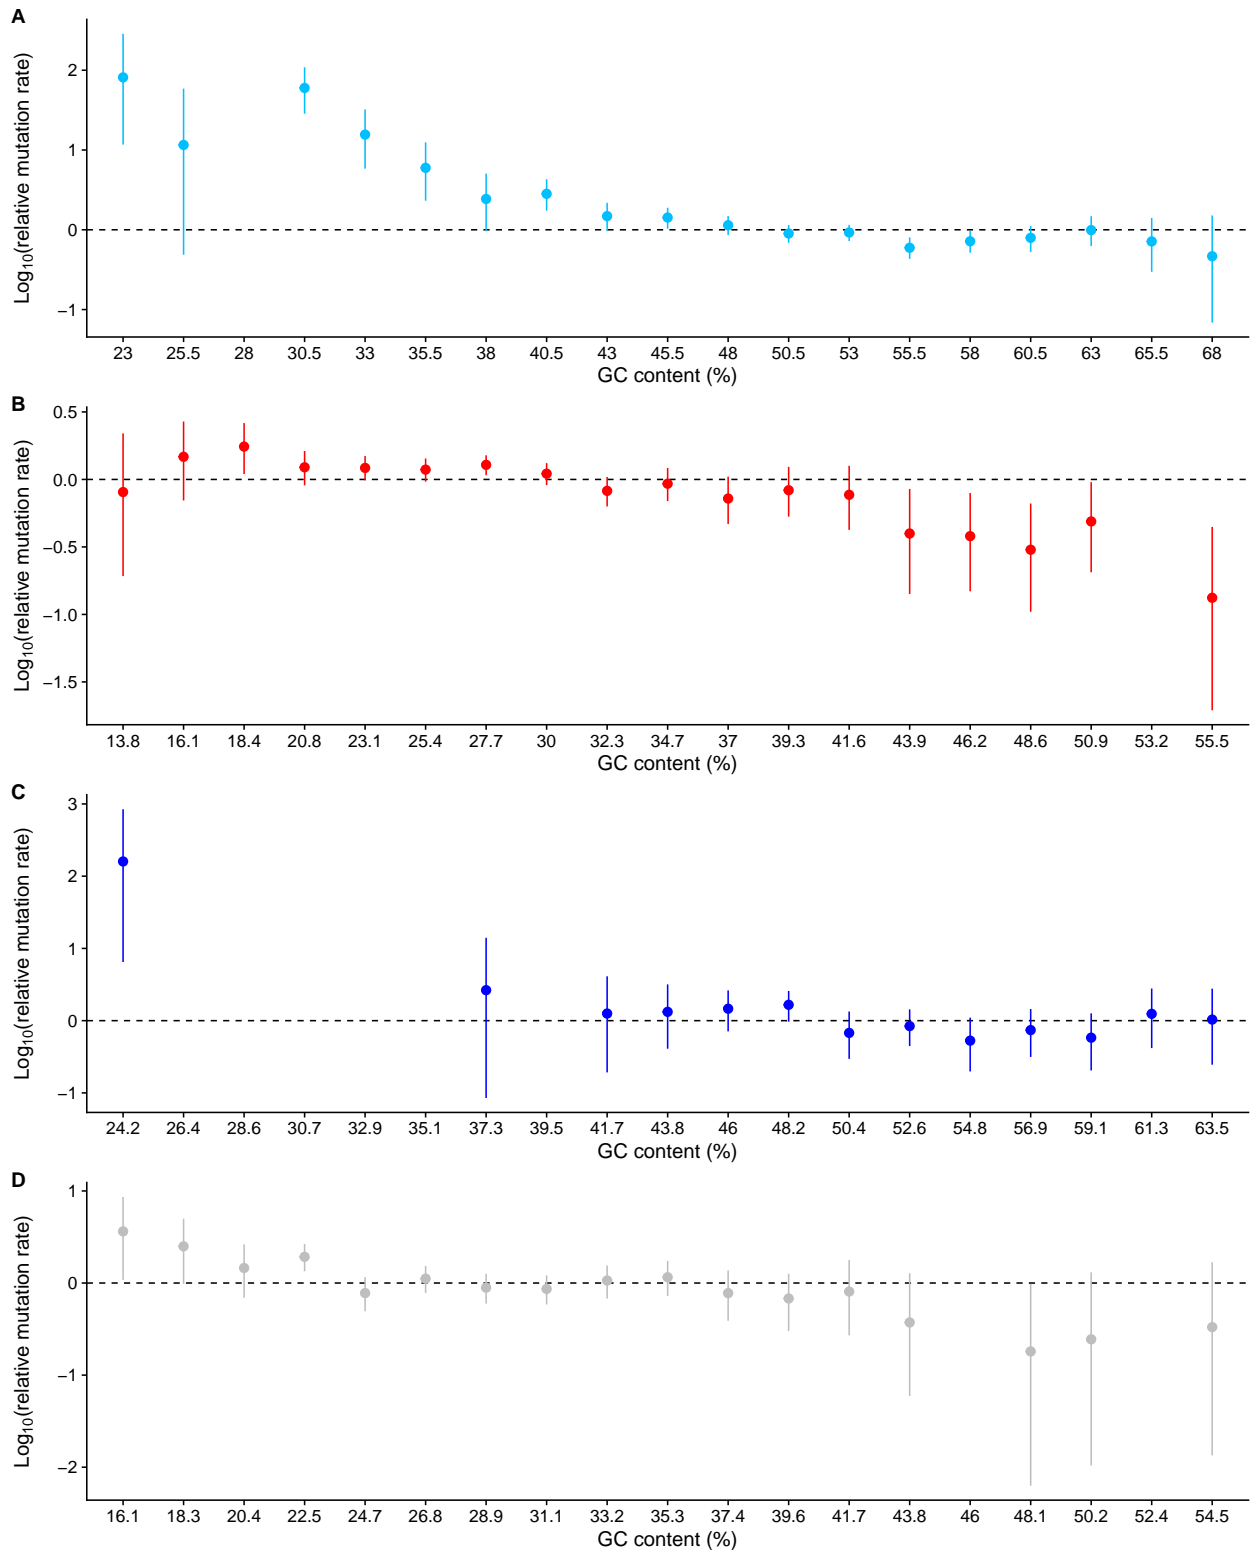

Figure S4: GC-content and relative mutation rate within domains. Relative mutation rates for windows of 200 bp binned for GC-content at 2.5 percentage point intervals. Ticks on the horizontal axis are at the end points of intervals. Note that y-axis is on a  $\log_{10}$  scale, the dashed line indicates relative mutation rate of one. Some bins did not contain any mutations, so estimates are missing for those bins. A) Euchromatic regions B) H3K9me3 domains C) H3K27me3 domains D) Centromeric regions.

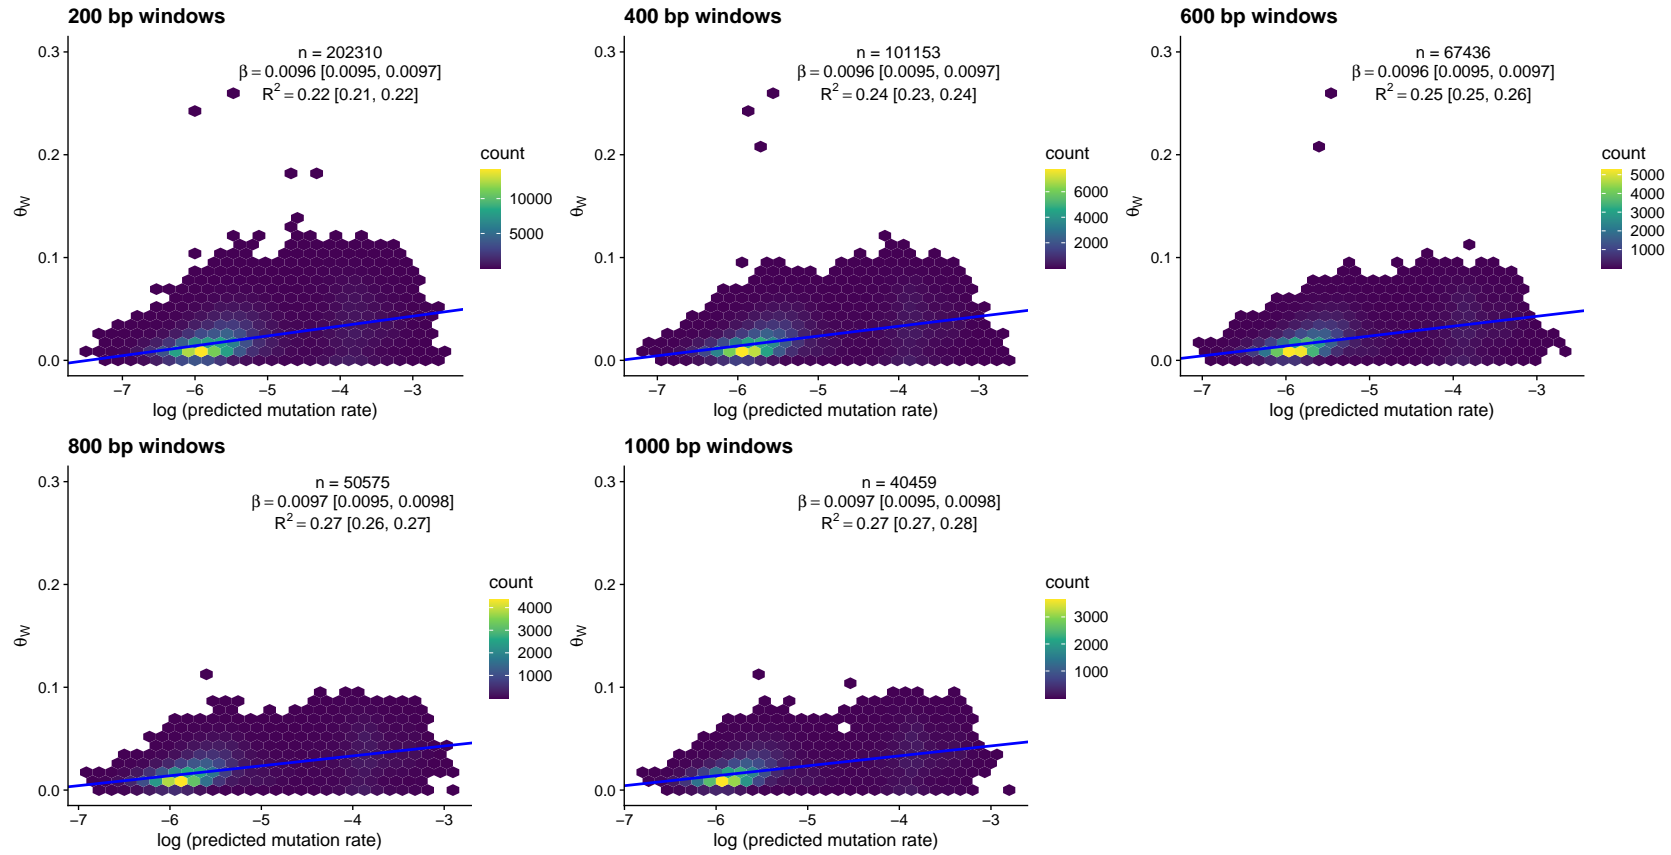

Figure S5: Effect of window size on regression between the predicted mutation rate and the observed nucleotide polymorphism in natural populations. Results have been calculated for different window sizes.  $n$  is the number of windows,  $\beta$  is the slope of the regression line, and  $R^2$  is the Bayesian  $R^2$  value, a measure of model fit.

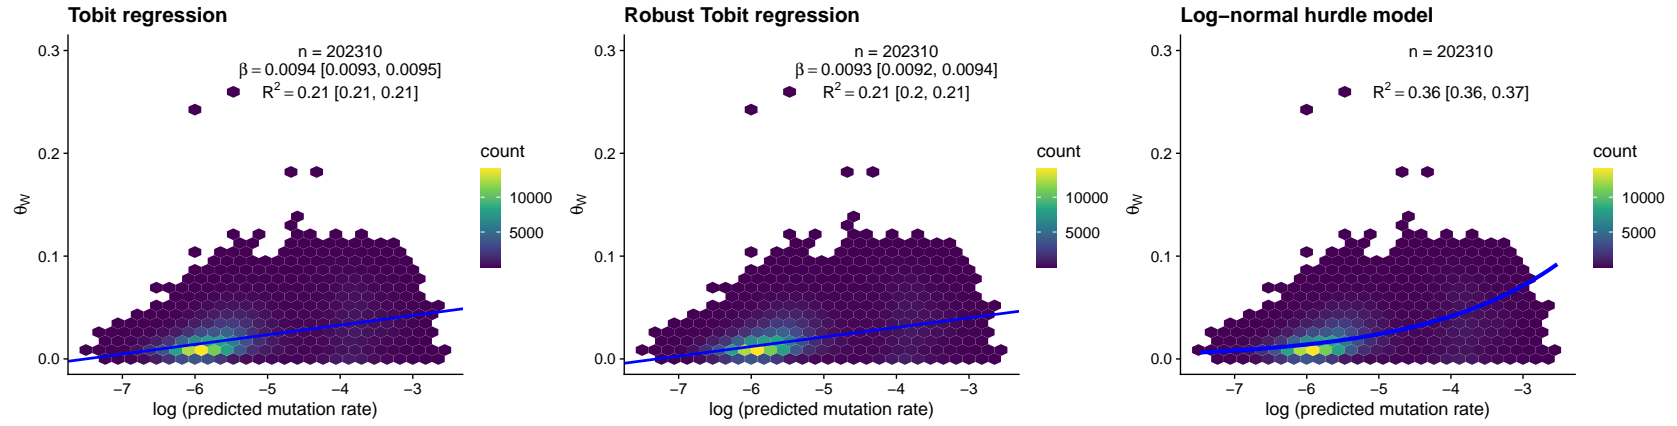

Figure S6: Effect of different models on regression between the predicted mutation rate and the observed nucleotide polymorphism. To check the robustness of results to windows where  $\theta = 0$ , different models were used. Window size = 200 bp,  $n$  is the number of windows,  $\beta$  is the slope of the regression line, and  $R^2$  is the Bayesian  $R^2$  value, a measure of model fit.

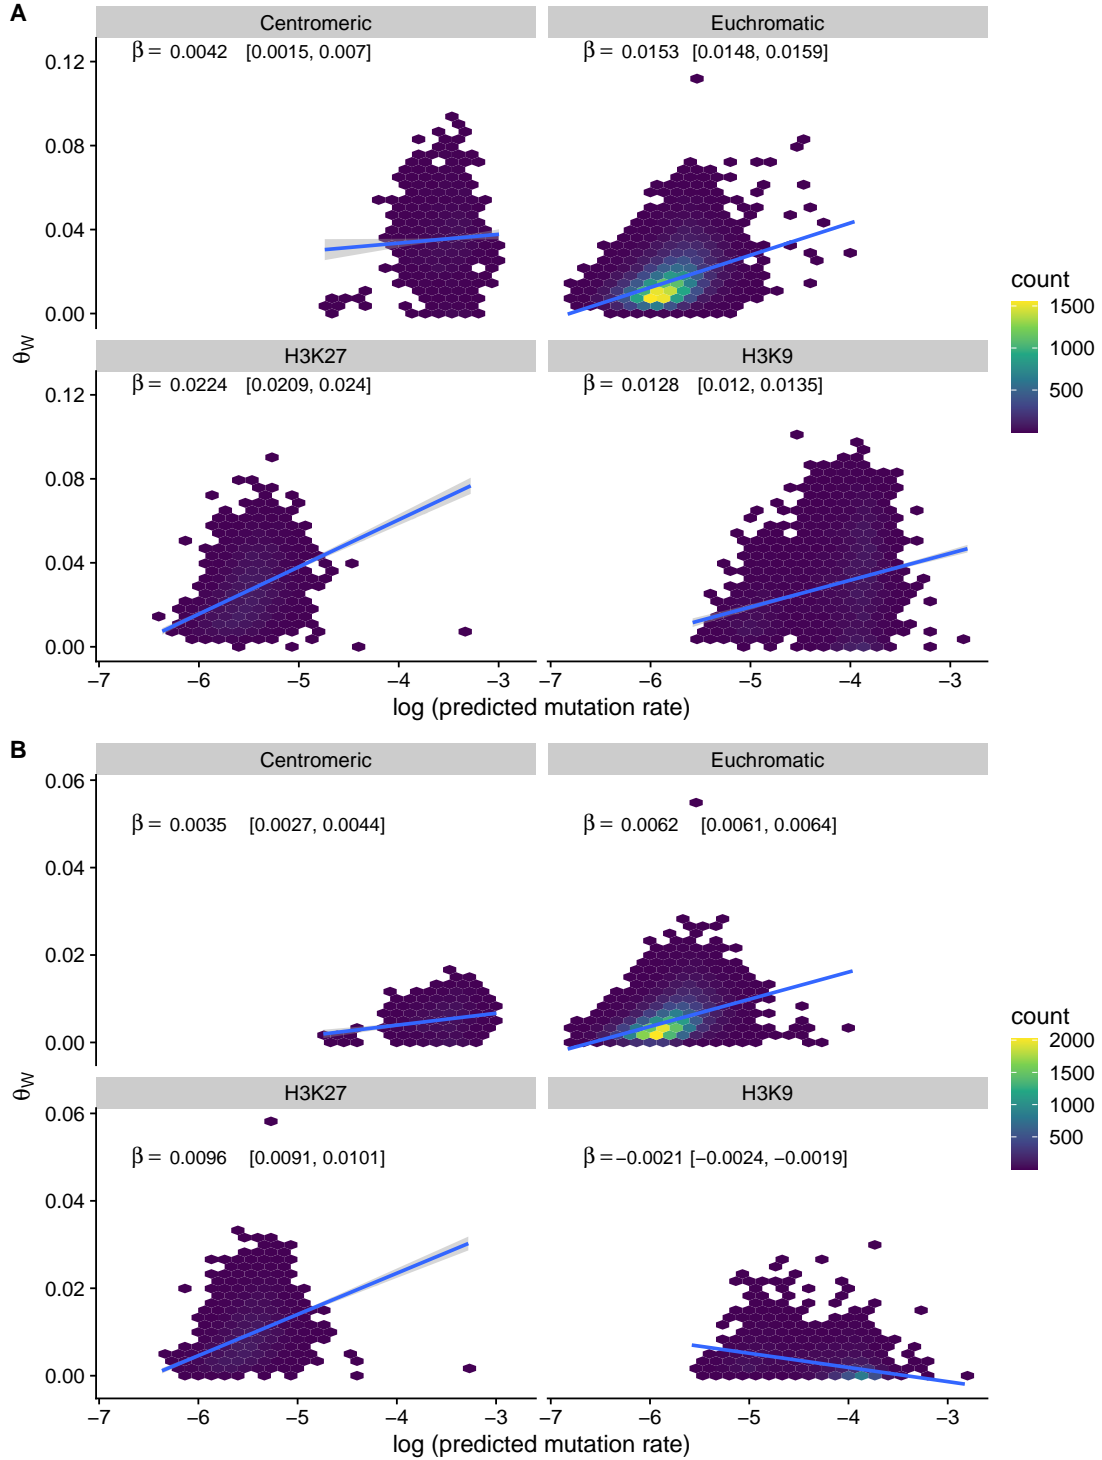

Figure S7: Regression between the predicted mutation rate and the observed nucleotide polymorphism within different regions of the genome. Window size was set to 1000 bp in both panels, as there are large number of windows where  $\theta = 0$  for small window sizes in the transversions only data.  $n = 40459$ ,  $\beta$  is the slope of the regression line. A)  $\theta$  has been calculated for all SNPs,  $R^2 = 0.32$  [0.32, 0.33]. B)  $\theta$  has been calculated only for SNPs that represent transversions,  $R^2 = 0.29$  [0.28, 0.30].

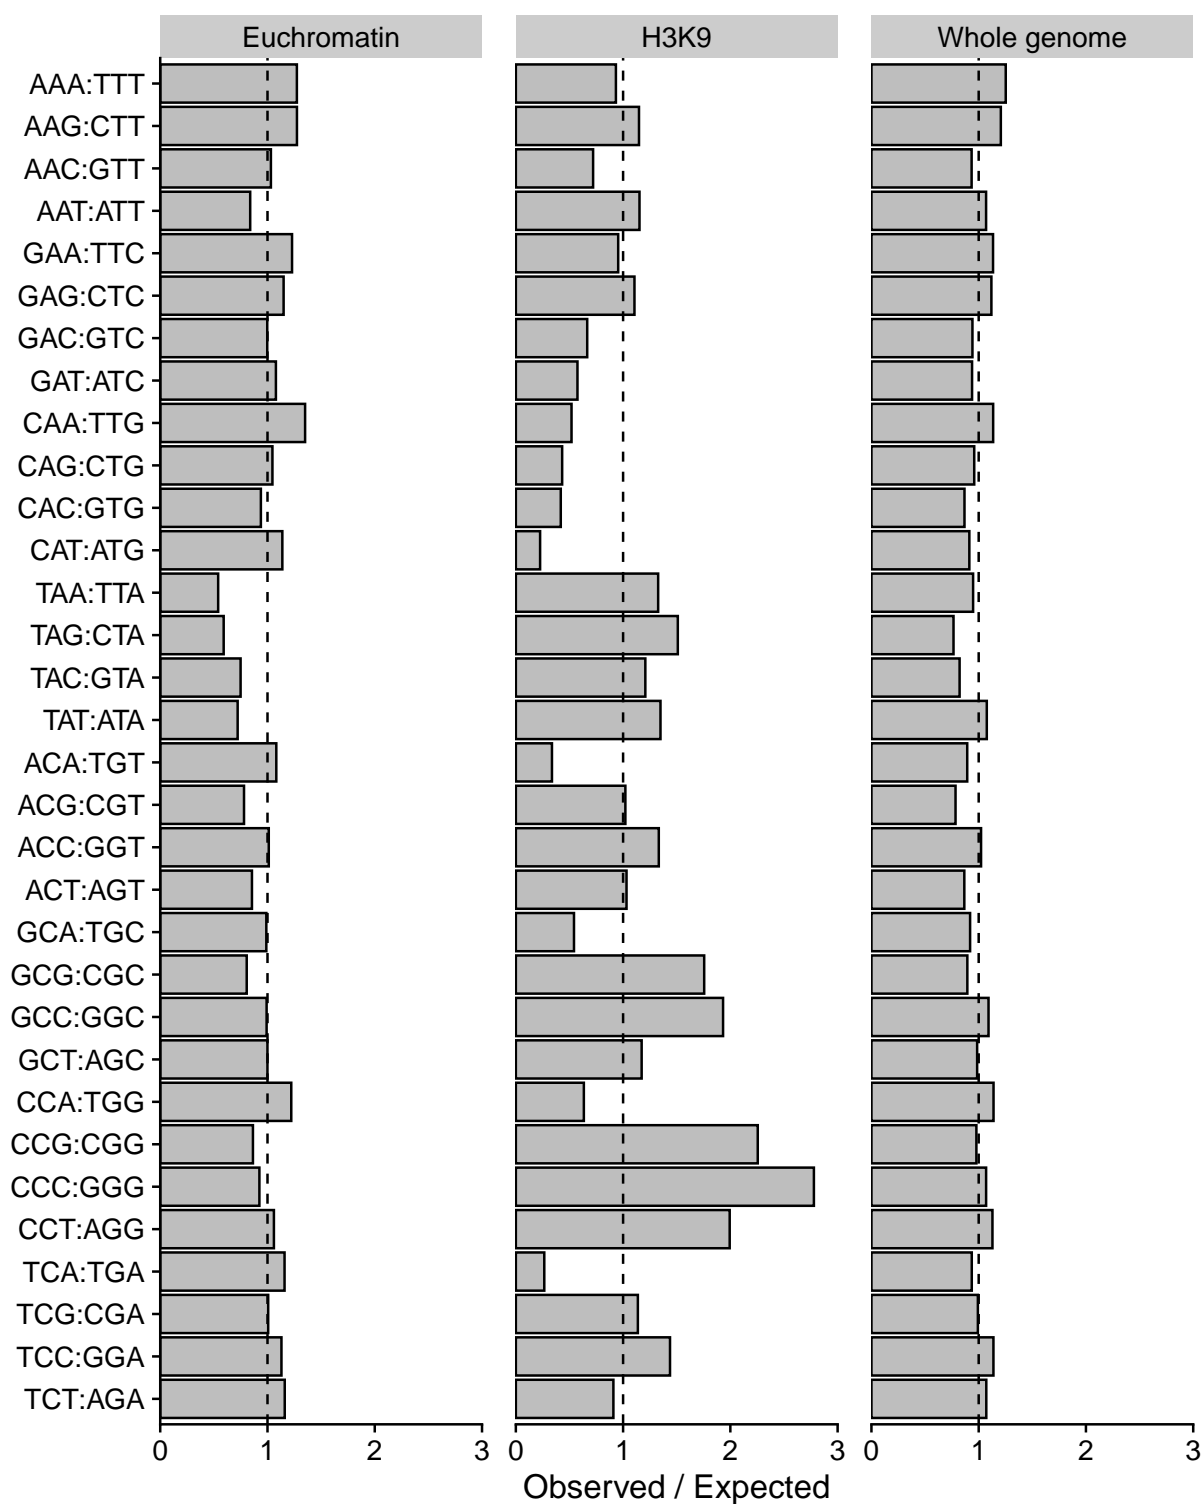

Figure S8: Observed deviations of trinucleotide frequencies from expectations for different parts of the genome. Observed trinucleotide frequencies were divided by their expected frequencies based on GC-content. The dashed line shows the expected ratio of one.

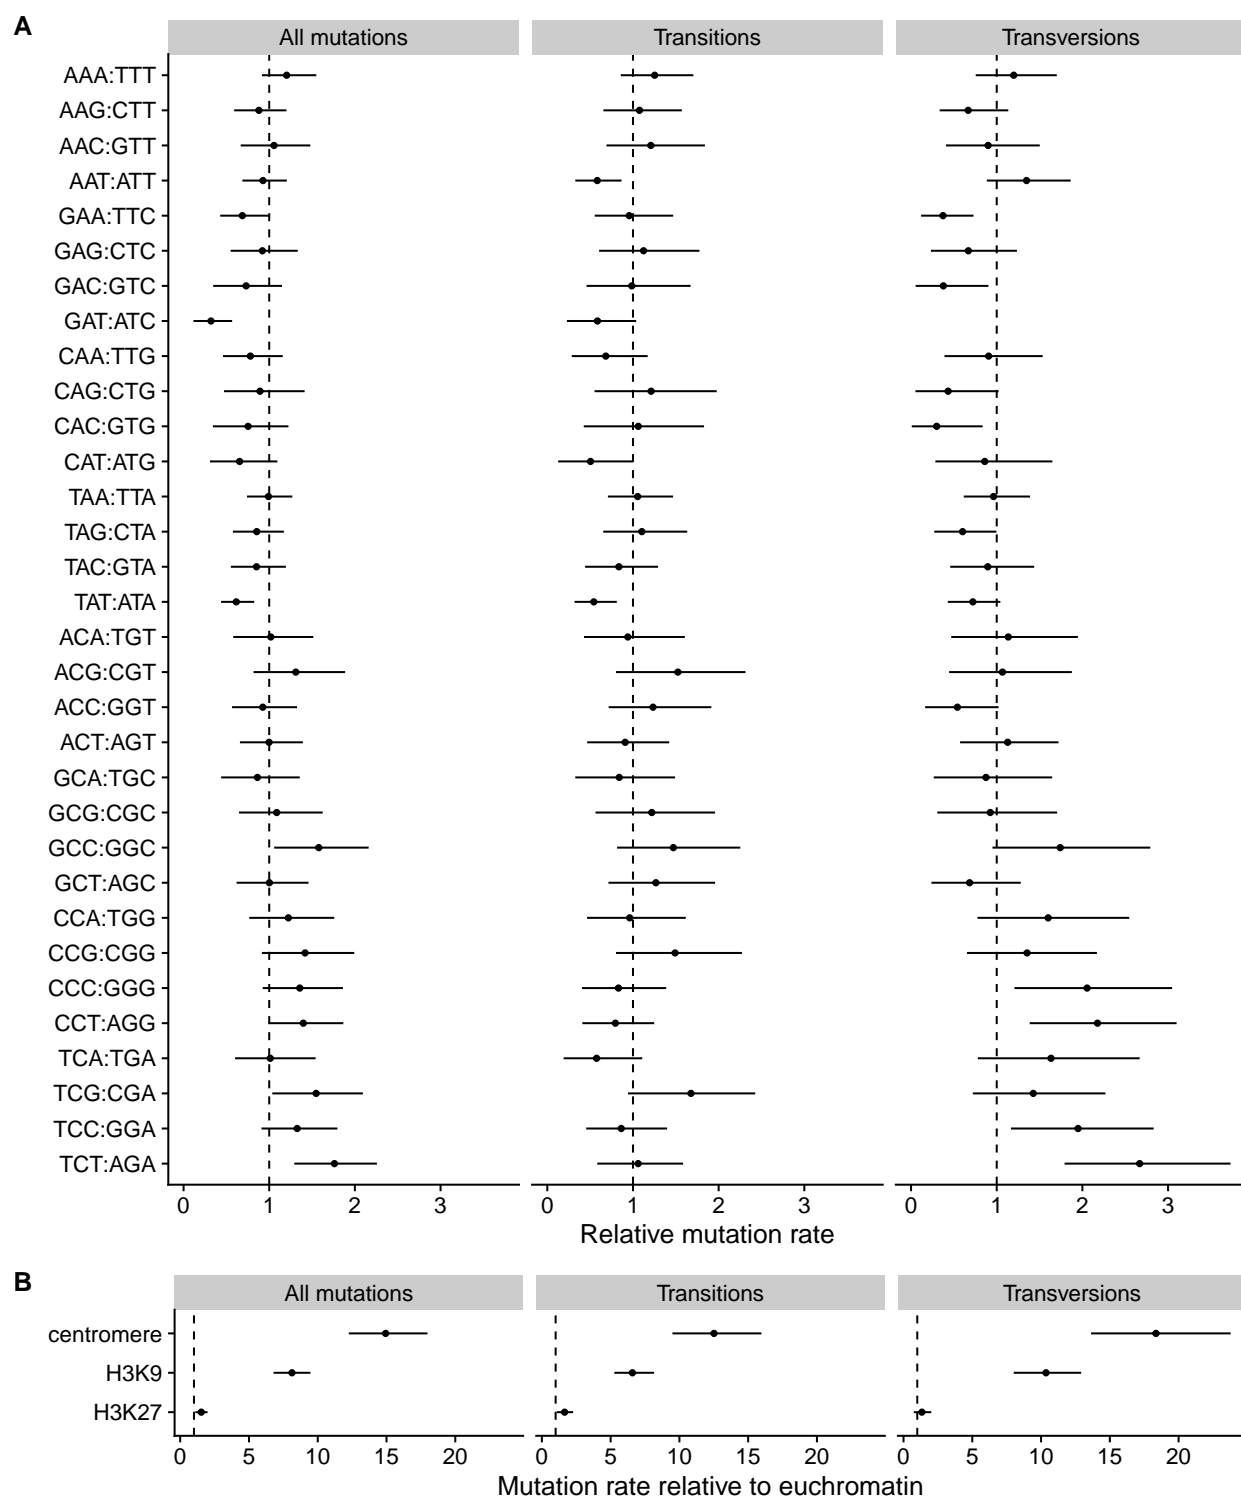

Figure S9: A) Relative mutation rates for the 32 different trinucleotide classes. B) Model estimates for relative mutation rates for centromeric, H3K9me3 and H3K27me3 domains from the trinucleotide model. Estimates are medians and range shows 95% HPD intervals.

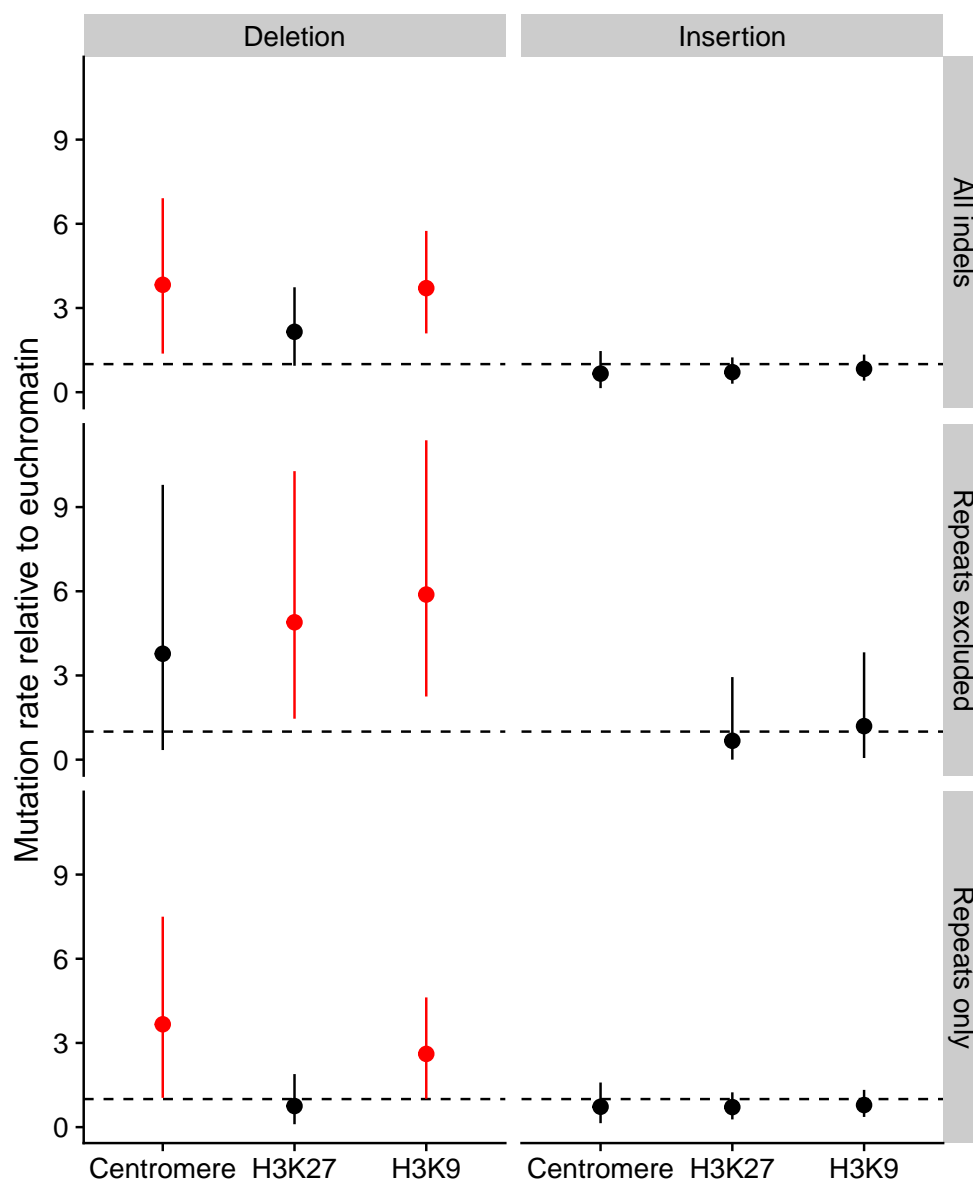

Figure S10: Mutation rates for indels in the different domains relative to euchromatin. The dashed line shows the relative mutation rate of one. Facets show deletions and insertions for all indels, for indels that did not occur in repeats, and for indels that occurred in repeated sequences. Estimates are medians and ranges show 95% HPD intervals. Intervals that do not overlap with one, that is, those where mutation rate is higher than in euchromatin are colored red.



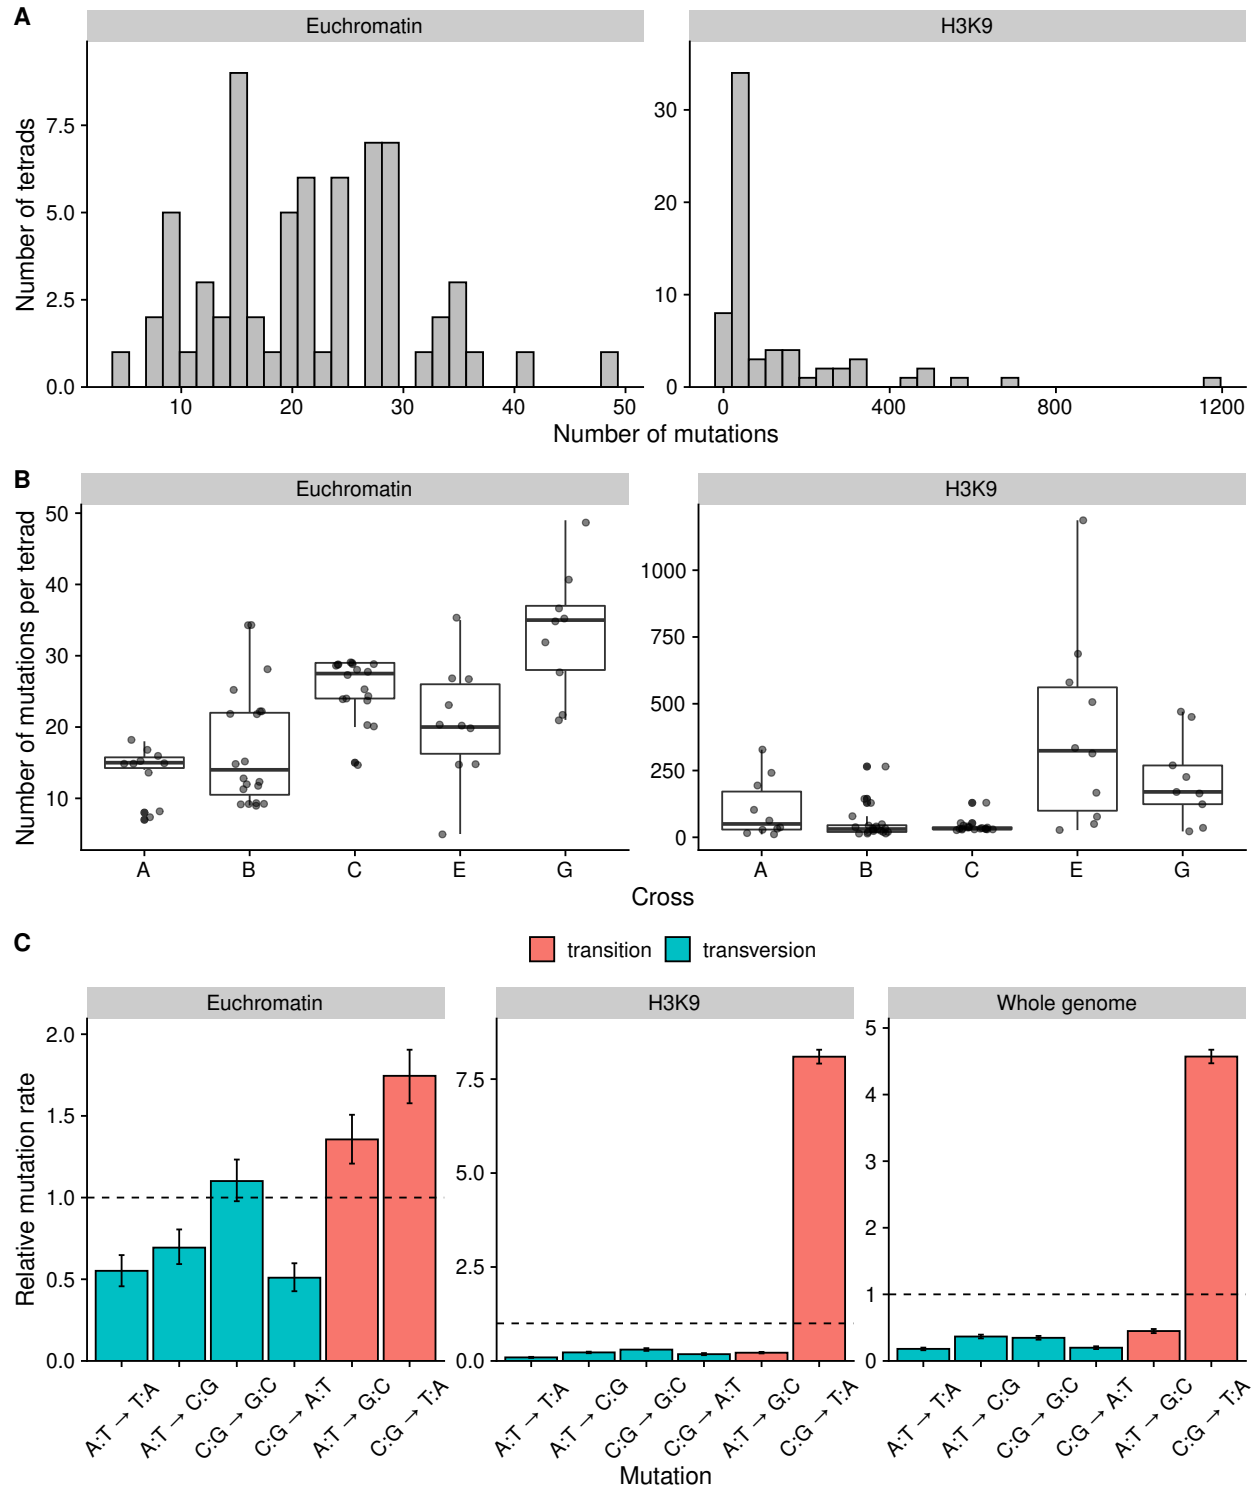

Figure S11: Mutations that occurred during sexual reproduction. Data is from Wang et al. (2020). Note that y-axis scales are different in different panels. A) The distribution of the number of mutations in the tetrads in euchromatin and H3K9 methylated domains. B) The number of mutations per tetrad for the different crosses. C) Spectrum of mutations for different regions of the genome. Error bars are 95% HPD intervals.

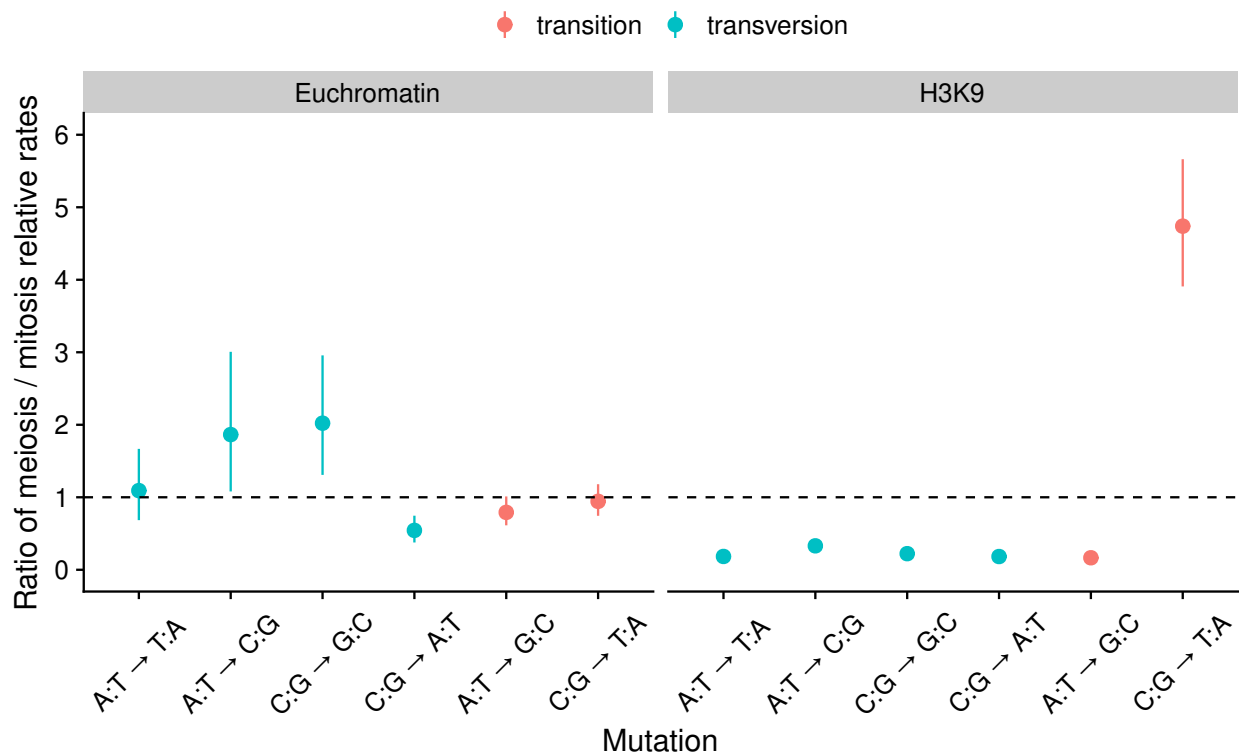

Figure S12: Ratios of the relative mutation rates during meiosis over mitosis. Points are medians and ranges show 95% HPD interval of the ratios. If the interval estimate is higher than one, mutation rate in meiosis is higher, if the interval estimate is lower than one, mutation rate in mitosis is higher.

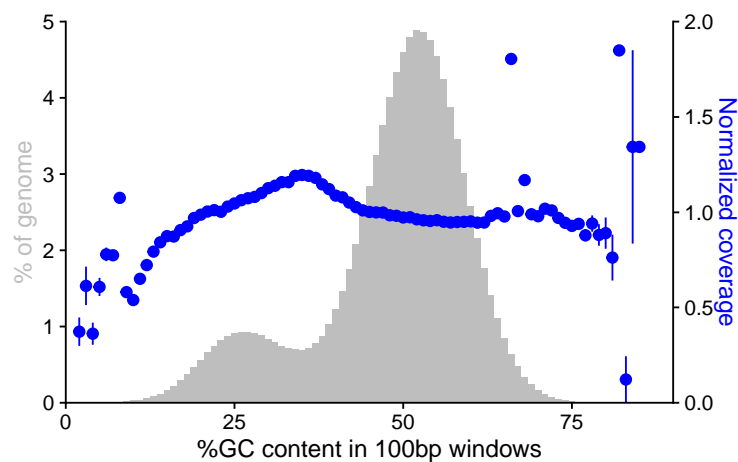

Figure S13: Sequencing coverage plotted against GC-content of the genome for the *mat A* ancestor. Other samples had similar profiles.

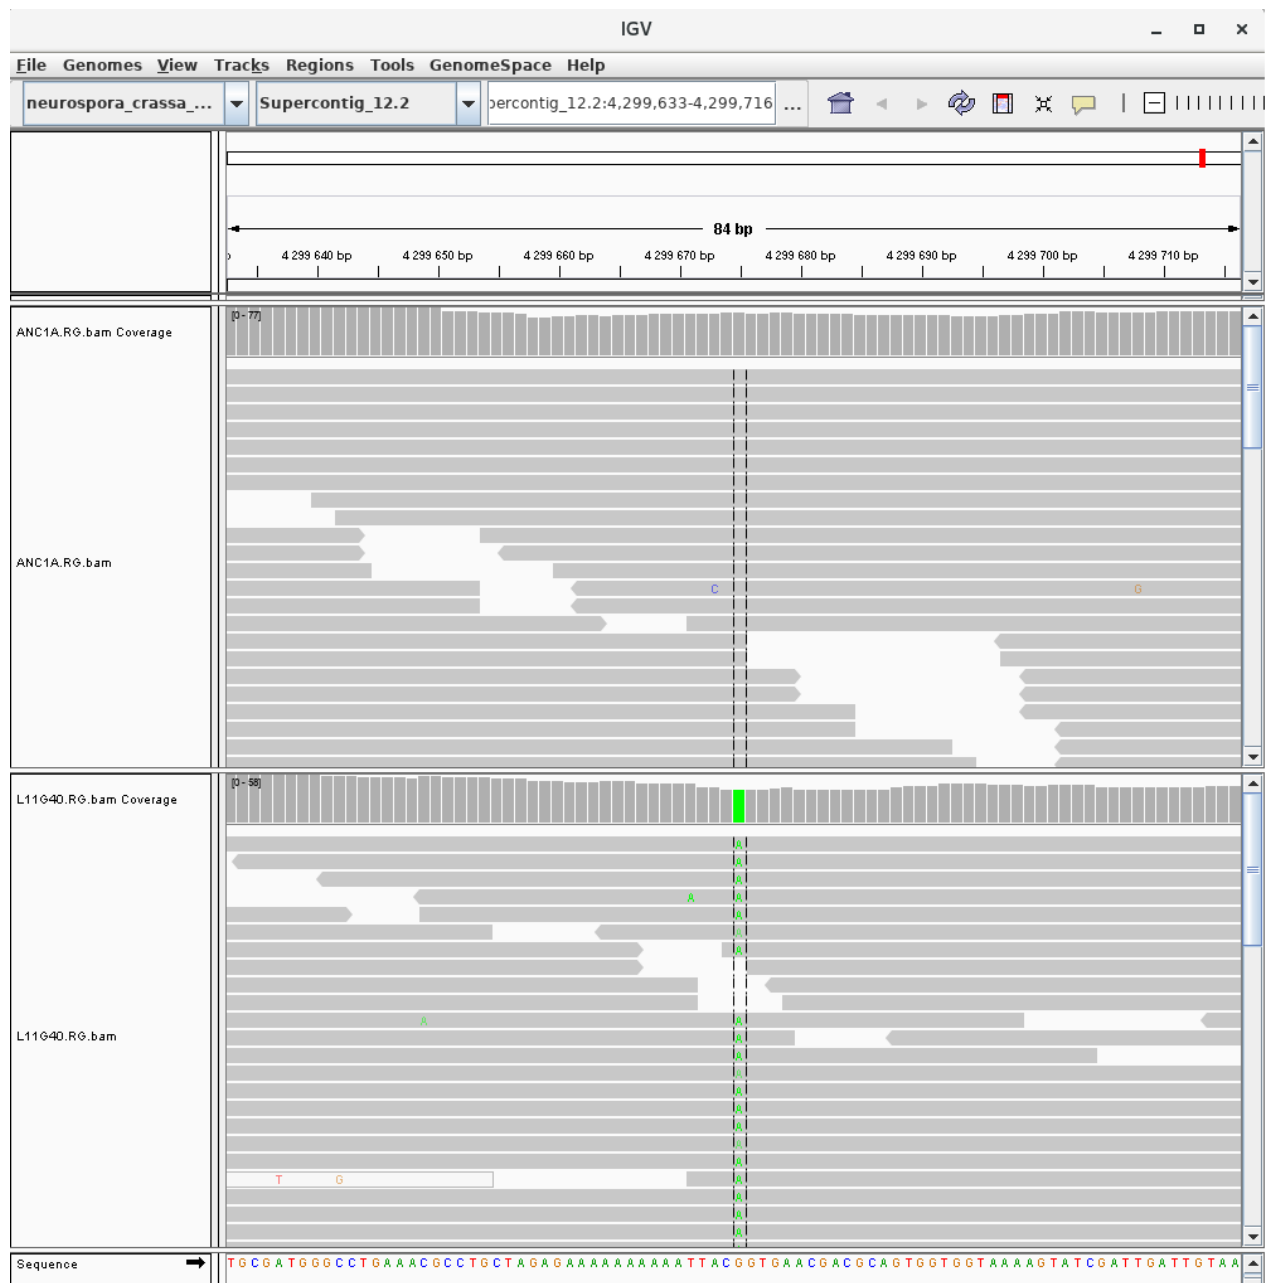

Figure S14: Screenshot of a mutation viewed in IGV. Upper track is the ancestor and lower track is MA line 11. Mutation is in chromosome 2, position 4 299 675, in euchromatin. Genotype quality of the mutation is 99.

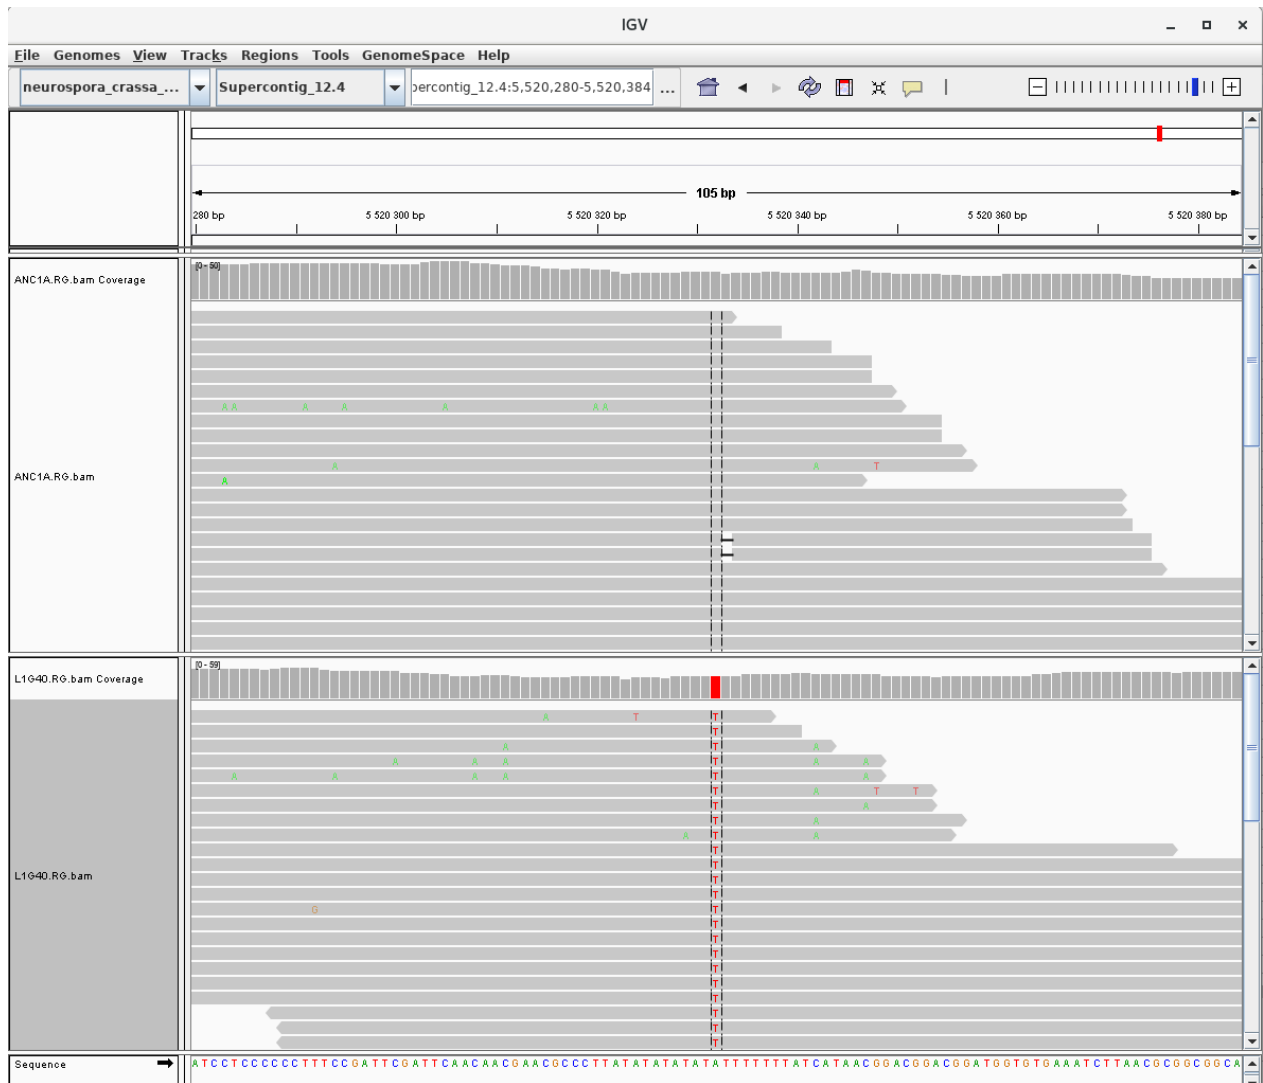

Figure S15: Screenshot of a mutation viewed in IGV. Upper track is the ancestor and lower track is MA line 1. Mutation is in chromosome 4, position 5 520 332, in euchromatin. Genotype quality of the mutation is 75.

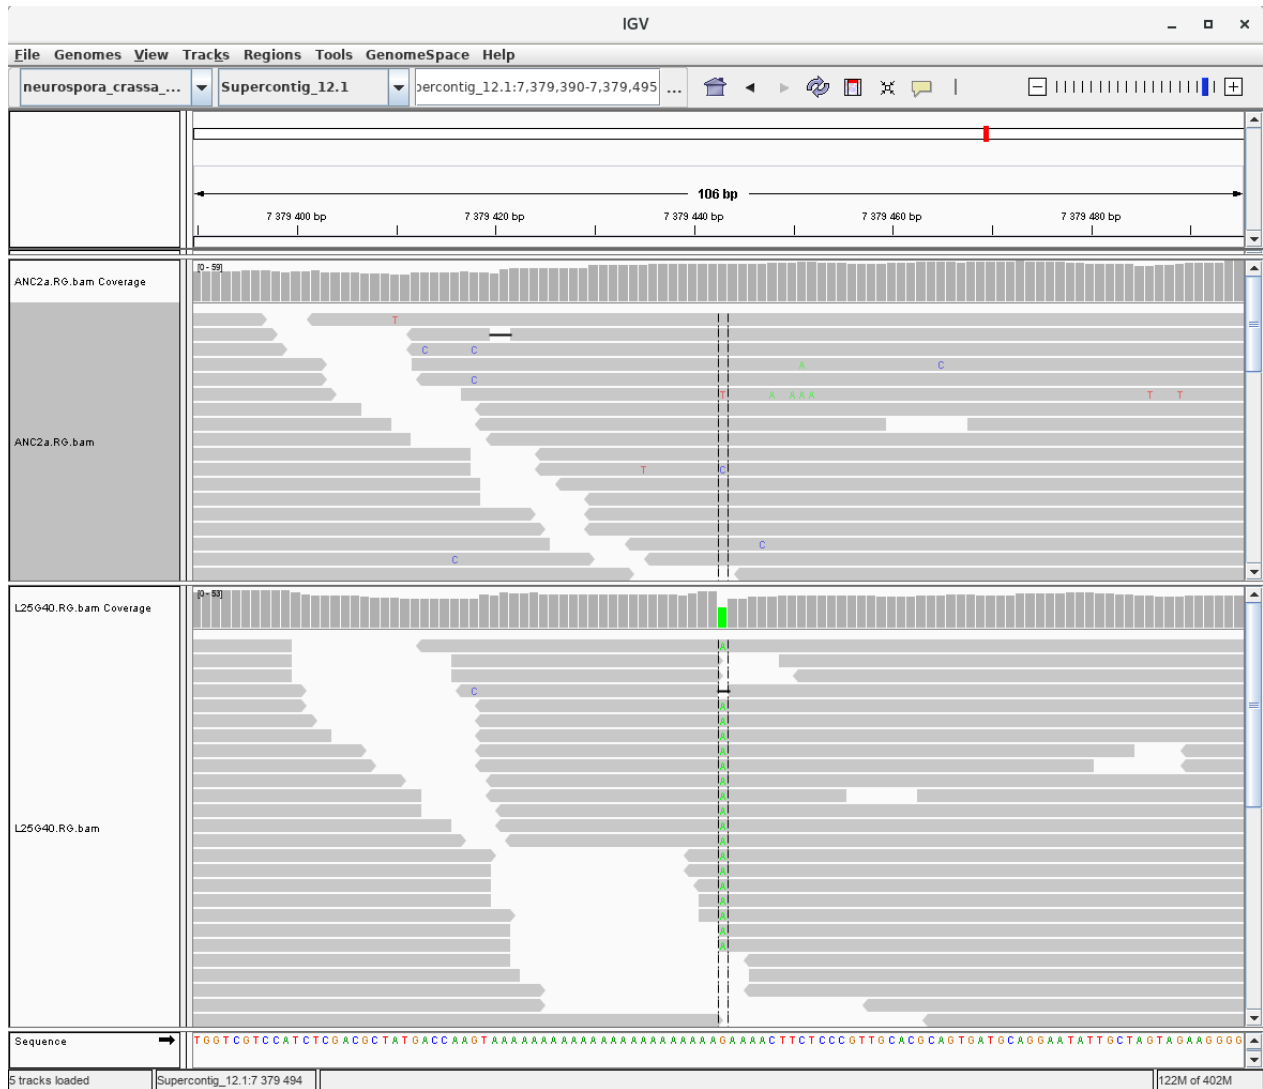

Figure S16: Screenshot of a mutation viewed in IGV. Upper track is the ancestor and lower track is MA line 25. Mutation is in chromosome 1, position 7 379 443, in euchromatin. Genotype quality of the mutation is 45 as the mutation is located in a repetitive region. This mutation was confirmed by Sanger sequencing.

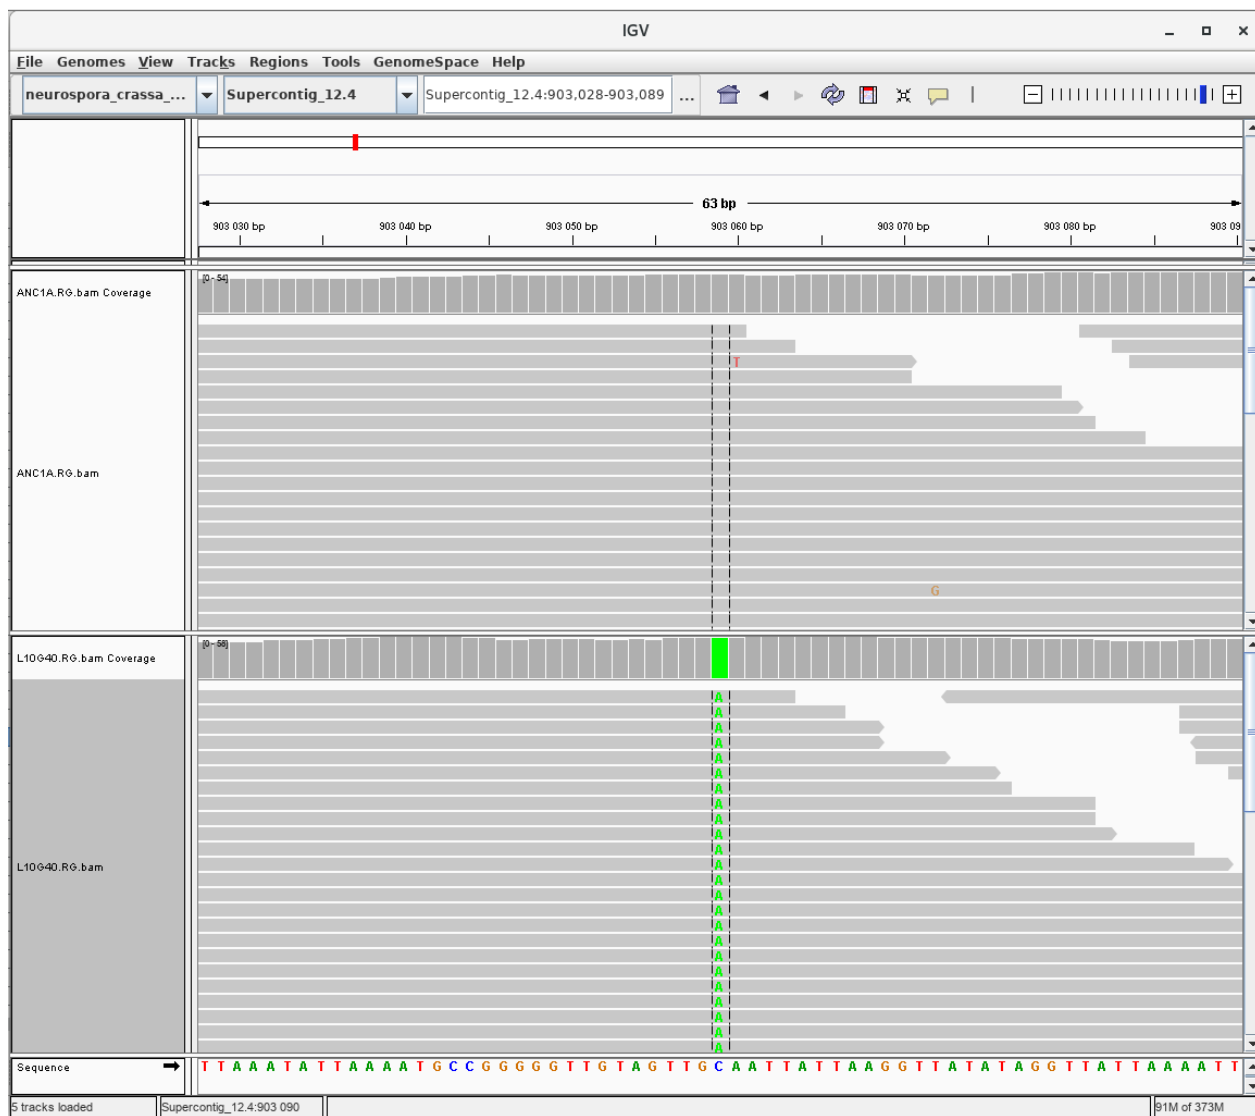

Figure S17: Screenshot of a mutation viewed in IGV. Upper track is the ancestor and lower track is MA line 10. Mutation is in chromosome 4, position 903 059, in centromeric region. Genotype quality of the mutation is 99.

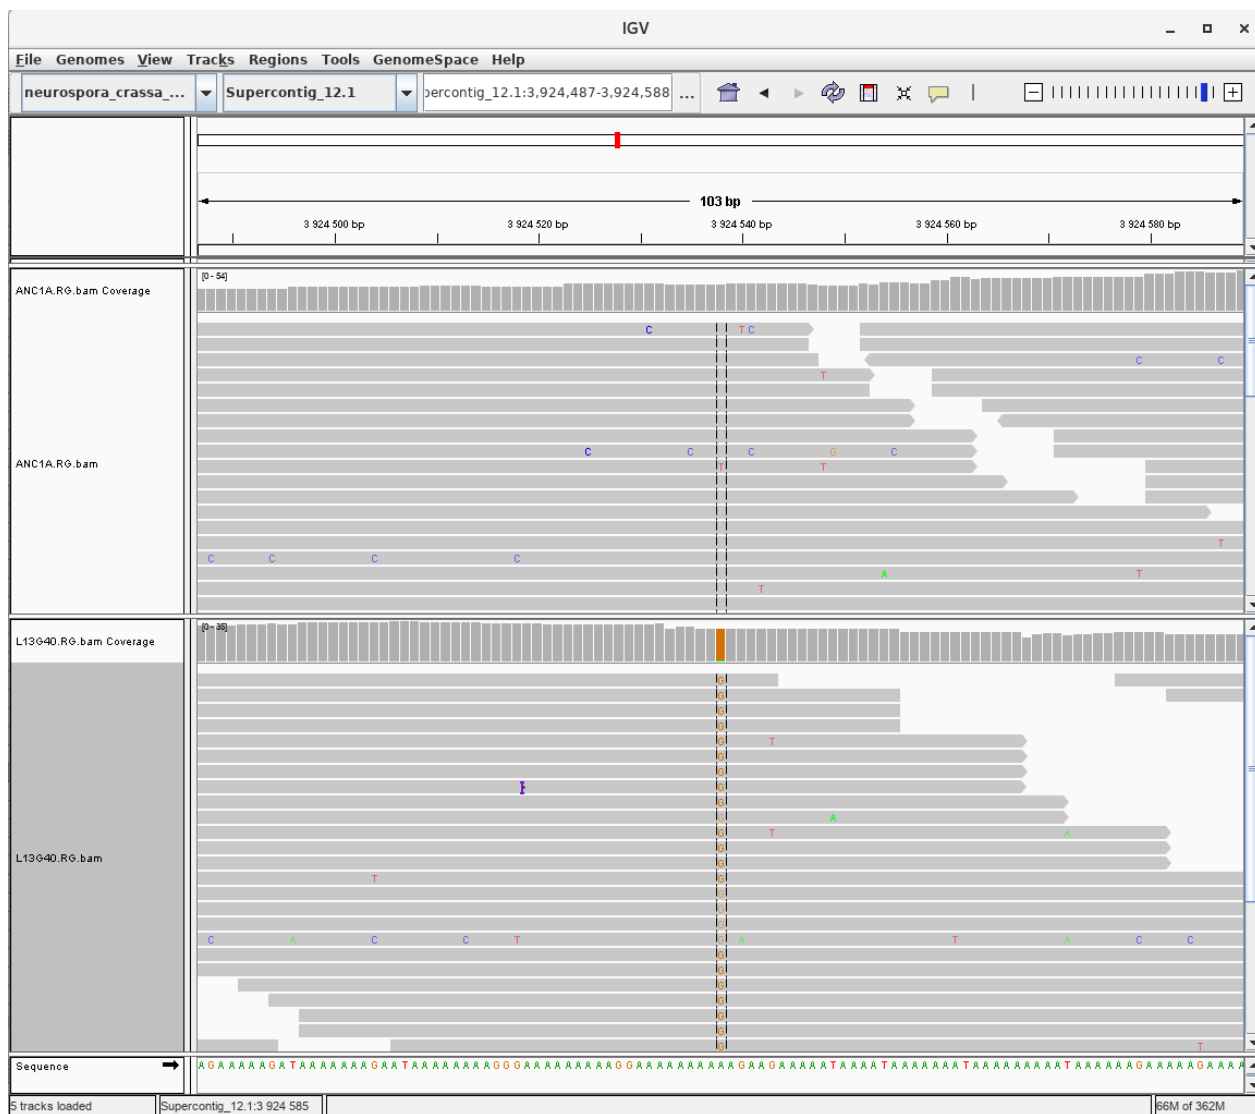

Figure S18: Screenshot of a mutation viewed in IGV. Upper track is the ancestor and lower track is MA line 13. Mutation is in chromosome 1, position 3 924 538, in centromeric region. Genotype quality of the mutation is 67 as the mutation is located in a repetitive region.

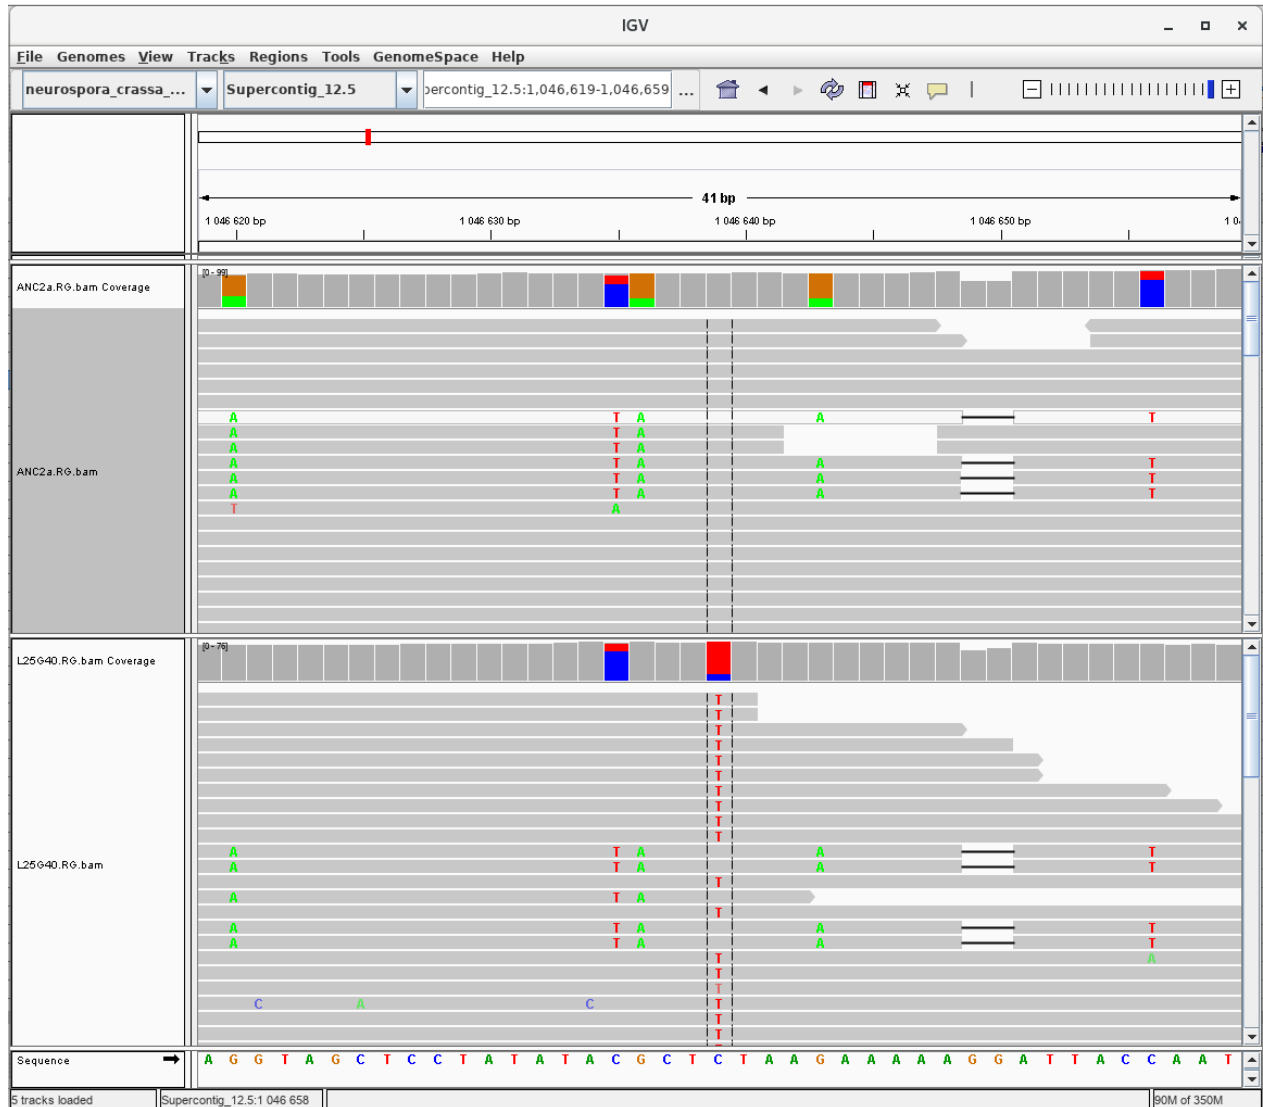

Figure S19: Screenshot of a mutation viewed in IGV. Upper track is the ancestor and lower track is MA line 25. Mutation is in chromosome 5, position 1 046 639, in centromeric region. Genotype quality of the mutation is 45 as the mutation is located in region with reduced mapping quality. Some reads that do not support the mutation map to this location. However, those reads also have other changes that are not supported by other reads. This suggest that reads not supporting the mutation are mapping errors. This mutation was confirmed by Sanger sequencing.



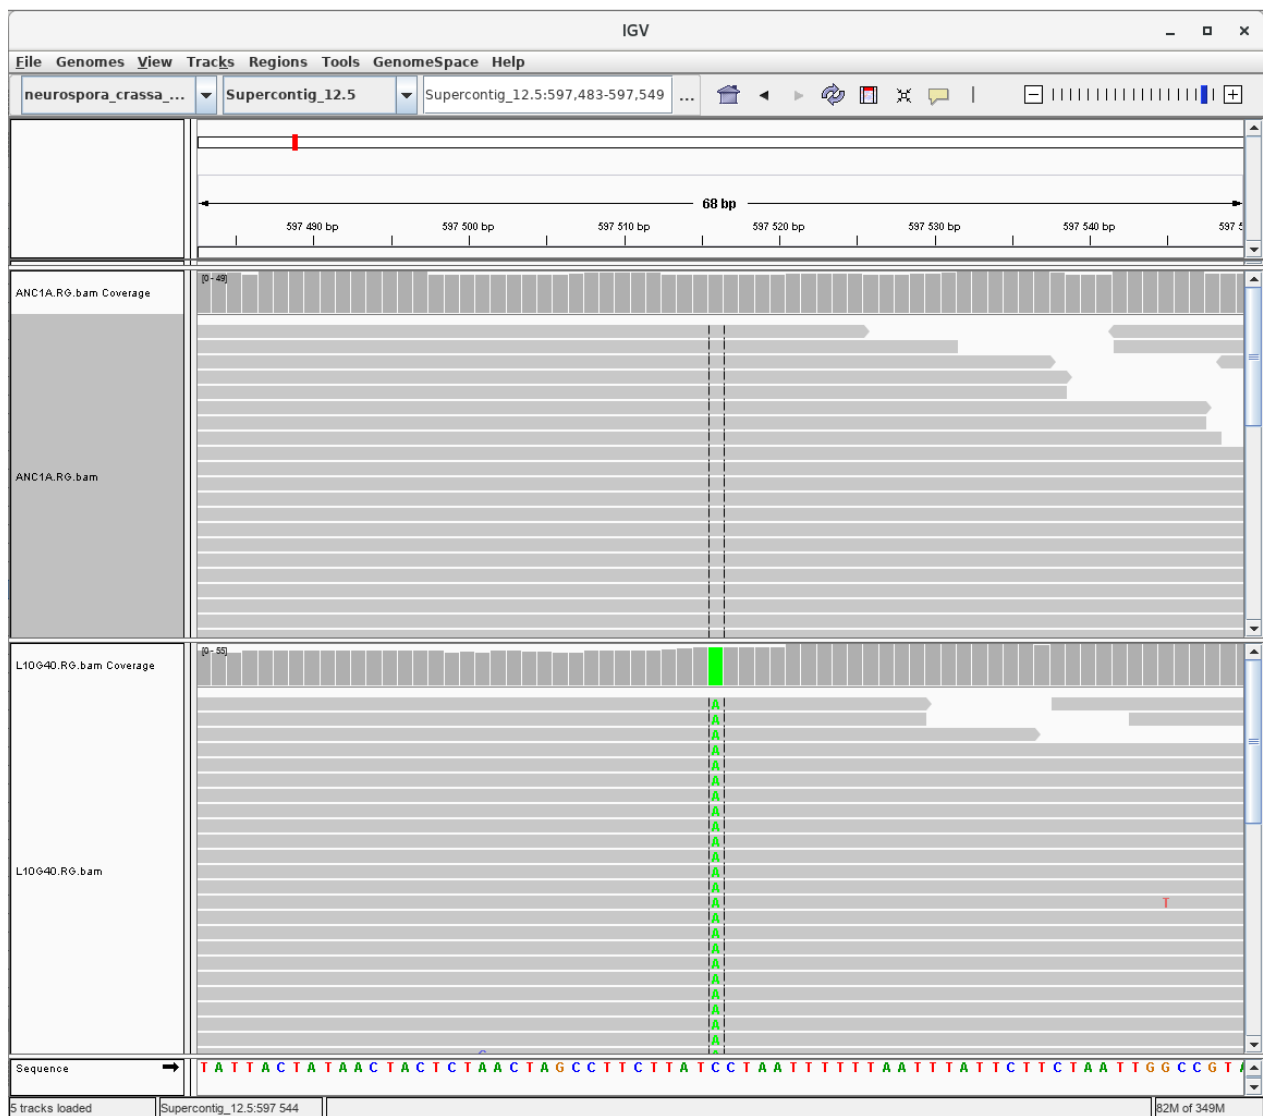

Figure S20: Screenshot of a mutation viewed in IGV. Upper track is the ancestor and lower track is MA line 10. Mutation is in chromosome 5, position 597 516, in region marked by H3K9 methylation. Genotype quality is 99.

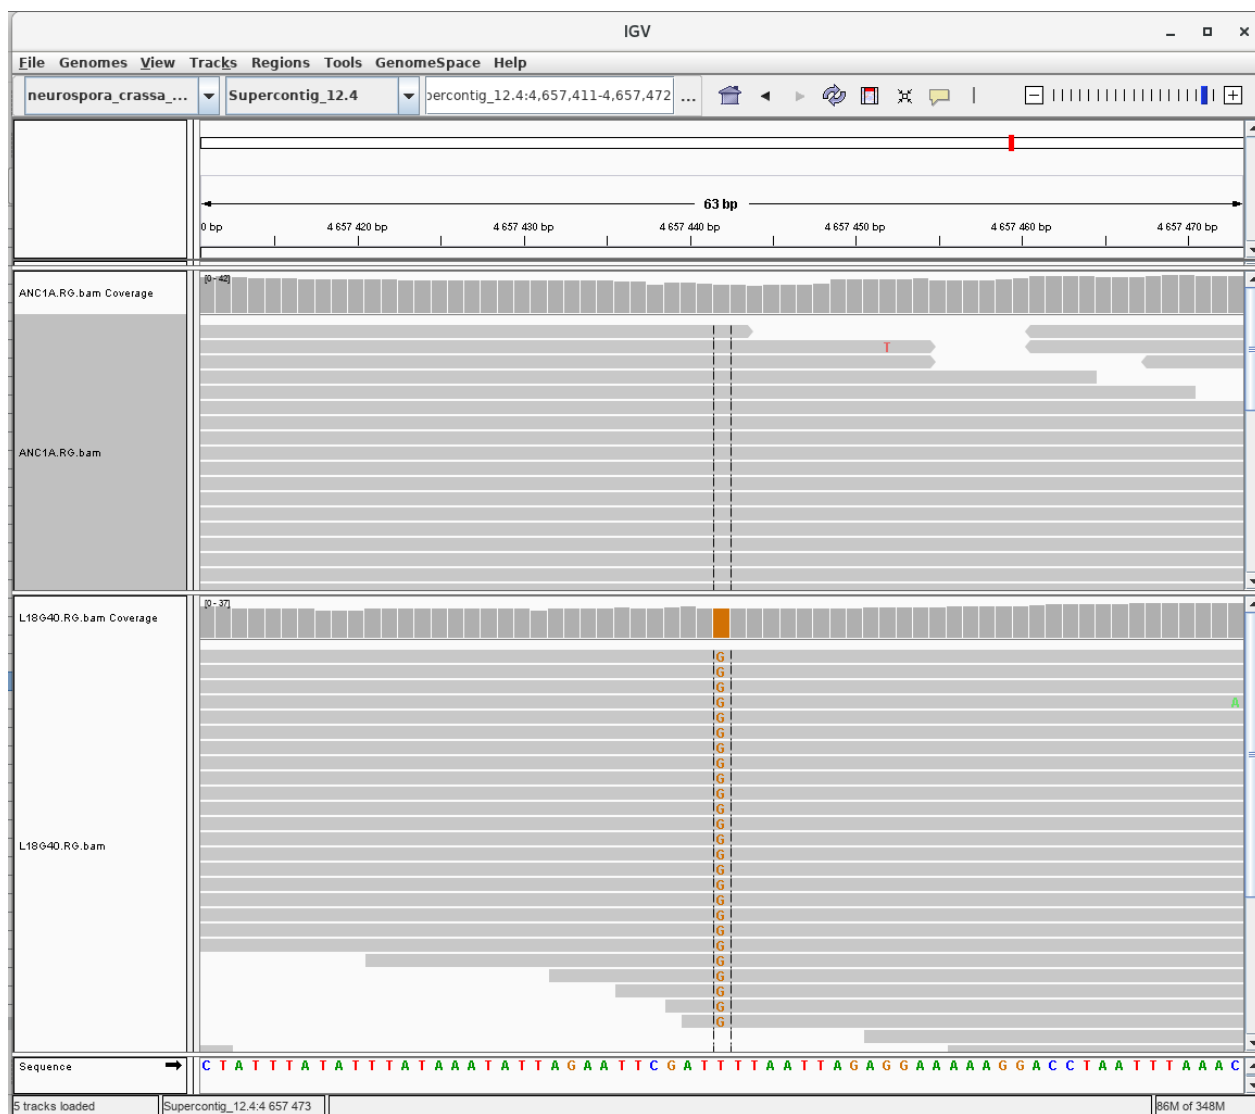

Figure S21: Screenshot of a mutation viewed in IGV. Upper track is the ancestor and lower track is MA line 18. Mutation is in chromosome 4, position 5 657 442, in region marked by H3K9 methylation. Genotype quality is 72.

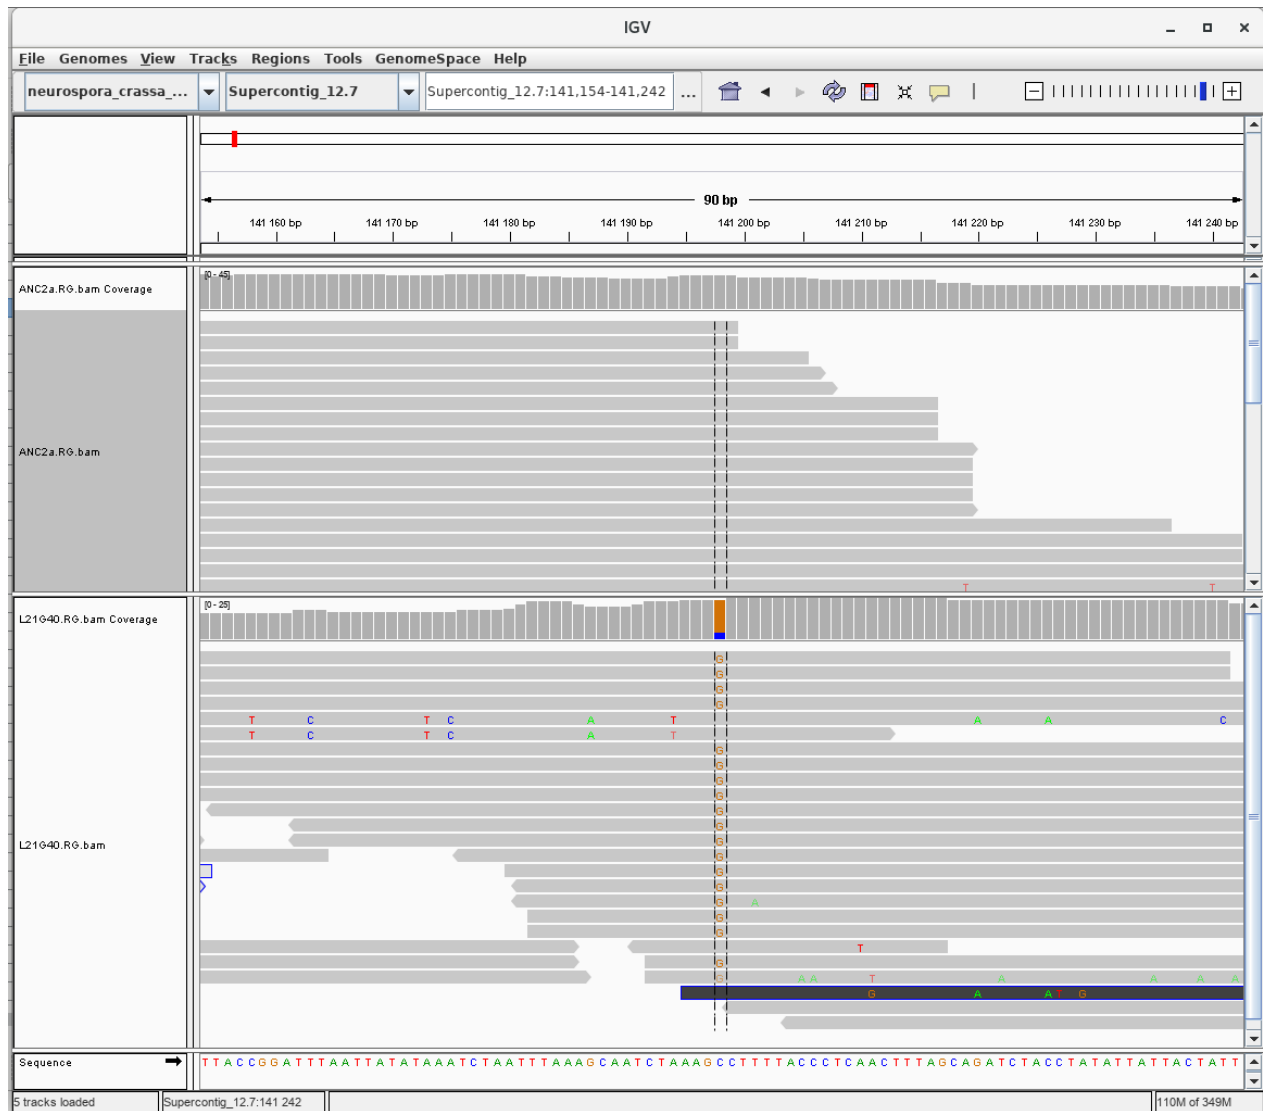

Figure S22: Screenshot of a mutation viewed in IGV. Upper track is the ancestor and lower track is MA line 21. Mutation is in chromosome 7, position 141 198, in region marked by H3K9 methylation. Genotype quality is 45. Some reads do not support the mutation. However, those reads have other changes that suggest a read mapping error. This mutation was confirmed by Sanger sequencing.

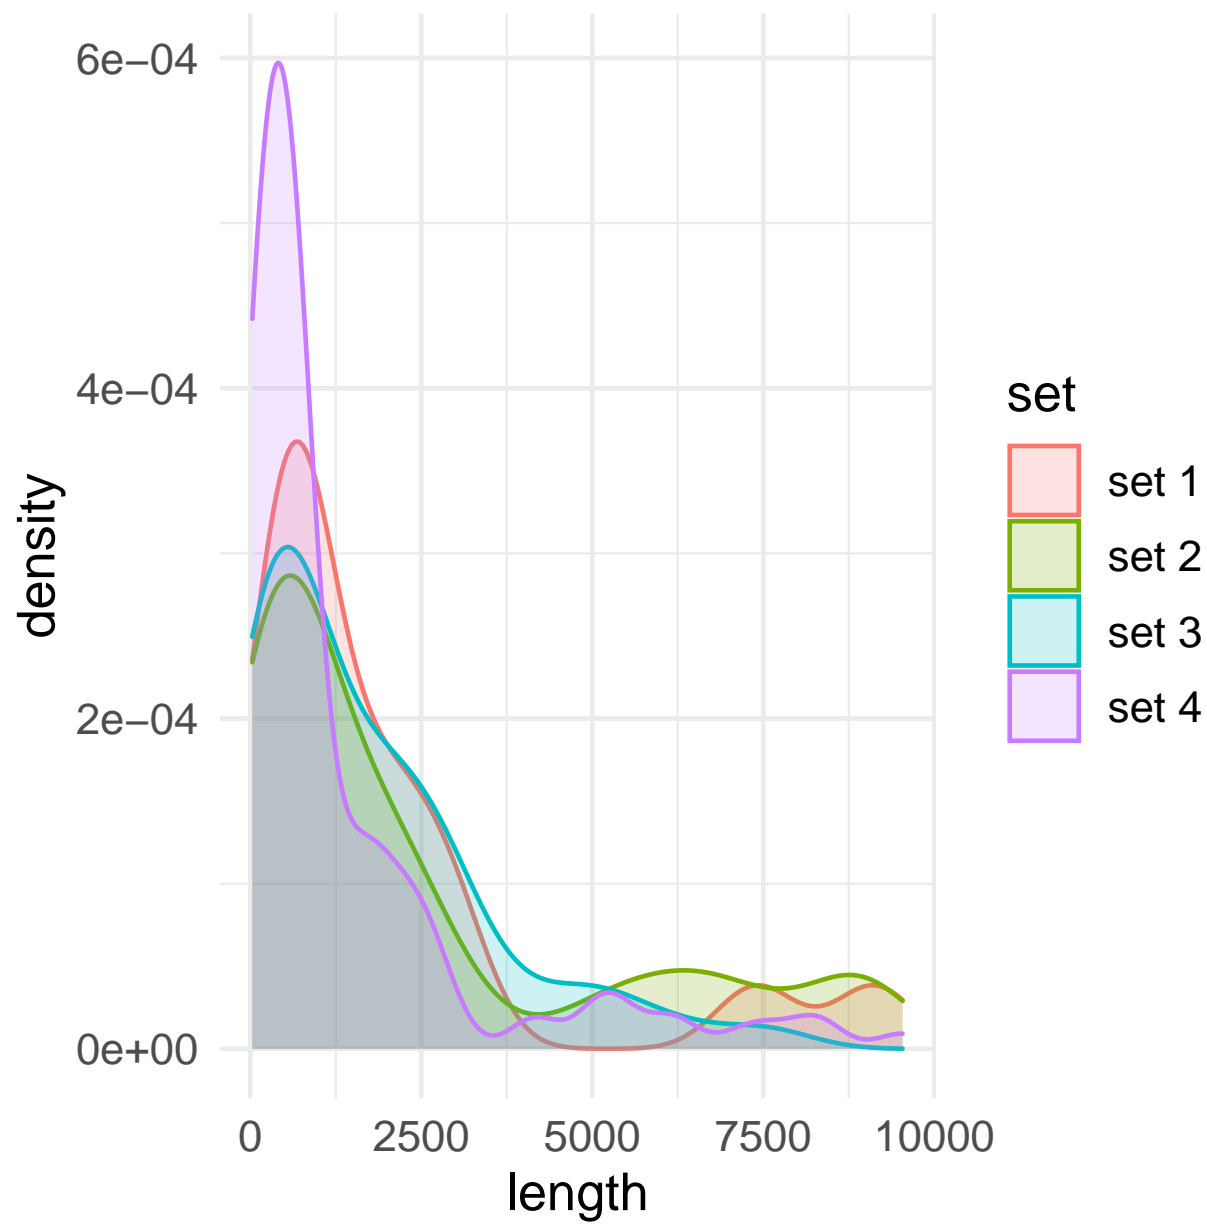

Figure S23: Densities for the length of distributions of SVs simulated using survivor. The characteristics of each simulated set are specified in the supplementary table S6.



Table S1: Summary of alignment metrics for genomes used in this study. The ancestors used to start the MA experiment were: B 26708, which is 2489 *mat A*, and B 26709, which is 2489 *mat a*. Lines L1–L20 are *mat A* and L21–L40 are *mat a*.

| Natural strains |                 |       |                  | MA lines |                 |       |                  |
|-----------------|-----------------|-------|------------------|----------|-----------------|-------|------------------|
| Line            | Number of reads | Depth | Mapped reads (%) | Line     | Number of reads | Depth | Mapped reads (%) |
| 10882           | 30683221        | 112   | 87.2             | B 26708  | 15183018        | 55    | 98.5             |
| 10883           | 20920000        | 76    | 69.7             | B 26709  | 18679696        | 68    | 98.3             |
| 10884           | 32294020        | 118   | 72.8             | L1       | 13215012        | 48    | 98.2             |
| 10886           | 15265173        | 56    | 92.7             | L2       | 15658340        | 57    | 98.2             |
| 10892           | 32124218        | 117   | 62.3             | L3       | 14699884        | 54    | 98.3             |
| 10904           | 14718008        | 54    | 91.1             | L4       | 16424902        | 60    | 98.2             |
| 10906           | 14935778        | 55    | 89.7             | L5       | 16328002        | 60    | 97.6             |
| 10907           | 32213115        | 118   | 68.1             | L6       | 15189850        | 55    | 98.3             |
| 10908           | 13924689        | 51    | 91.7             | L7       | 14006386        | 51    | 98.4             |
| 10912           | 14829204        | 54    | 92               | L8       | 13888092        | 51    | 98               |
| 10914           | 30158241        | 110   | 61.1             | L9       | 14386986        | 53    | 98.3             |
| 10915           | 24410441        | 89    | 61.1             | L10      | 15458492        | 56    | 98.6             |
| 10918           | 40163515        | 147   | 65.4             | L11      | 13884490        | 51    | 98.1             |
| 10923           | 16231892        | 59    | 92               | L12      | 15913482        | 58    | 98.2             |
| 10925           | 37031022        | 135   | 85.2             | L13      | 20192750        | 74    | 97.8             |
| 10926           | 32682749        | 119   | 66               | L14      | 17445964        | 64    | 98.1             |
| 10927           | 17741573        | 65    | 73.1             | L15      | 14776588        | 54    | 98.5             |
| 10928           | 15048163        | 55    | 92               | L16      | 14562124        | 53    | 98               |
| 10932           | 13402421        | 49    | 91.1             | L17      | 16043040        | 59    | 97.9             |
| 10935           | 22304835        | 81    | 81.1             | L18      | 14755826        | 54    | 97.7             |
| 10937           | 29757556        | 109   | 85.4             | L19      | 13712542        | 50    | 98.1             |
| 10943           | 32838278        | 120   | 72.8             | L20      | 18685746        | 68    | 96.9             |
| 10946           | 17261401        | 63    | 90.1             | L21      | 14814794        | 54    | 98.5             |
| 10948           | 13835447        | 50    | 91               | L22      | 15849832        | 58    | 98               |
| 10950           | 14364201        | 52    | 98               | L23      | 17528602        | 64    | 98.3             |
| 10951           | 13354998        | 49    | 89.5             | L24      | 14415798        | 53    | 97.8             |
| 10983           | 38349194        | 140   | 72.8             | L25      | 14773870        | 54    | 98.1             |
| 1131            | 16974127        | 62    | 88.7             | L26      | 17436754        | 64    | 98.2             |
| 1133            | 14540257        | 53    | 88.3             | L27      | 14047860        | 51    | 98.2             |
| 1165            | 15095250        | 55    | 90               | L28      | 16295790        | 59    | 98.3             |
| 3210            | 13681263        | 50    | 90.4             | L29      | 16244750        | 59    | 98.1             |
| 3211            | 13908534        | 51    | 89.4             | L30      | 19847786        | 72    | 98.1             |
| 3223            | 14095397        | 51    | 92.1             | L31      | 19613222        | 72    | 97.9             |
| 3943            | 143993668       | 525   | 82.6             | L33      | 33430658        | 122   | 97.9             |
| 3975            | 13671543        | 50    | 88.8             | L34      | 15456254        | 56    | 97.9             |
| 4708            | 14310459        | 52    | 87.7             | L35      | 14405808        | 53    | 98               |
| 4712            | 12602174        | 46    | 86               | L36      | 15567642        | 57    | 97.8             |
| 4716            | 18336337        | 67    | 86.7             | L37      | 15232240        | 56    | 98               |
| 4730            | 15588817        | 57    | 87.4             | L38      | 14265830        | 52    | 98               |
| 4824            | 12921275        | 47    | 88.3             | L39      | 16540462        | 60    | 98.1             |
| 5910            | 12494976        | 46    | 83.4             | L40      | 18856392        | 69    | 98.3             |
| 6203            | 13266522        | 48    | 89.3             |          |                 |       |                  |
| 851             | 12956372        | 47    | 89.7             |          |                 |       |                  |
| 8783            | 15381794        | 56    | 88               |          |                 |       |                  |
| 8790            | 13205097        | 48    | 90.1             |          |                 |       |                  |
| 8816            | 15452652        | 56    | 89.6             |          |                 |       |                  |
| 8819            | 13736103        | 50    | 87.5             |          |                 |       |                  |
| 8845            | 15868843        | 58    | 86.9             |          |                 |       |                  |
| 8850            | 12695261        | 46    | 89.3             |          |                 |       |                  |
| P4452           | 172179164       | 628   | 86.9             |          |                 |       |                  |
| P4463           | 21708426        | 79    | 69.7             |          |                 |       |                  |
| P4468           | 21129155        | 77    | 68.4             |          |                 |       |                  |
| P4471           | 24828717        | 91    | 72.4             |          |                 |       |                  |
| P4476           | 92452134        | 337   | 86.8             |          |                 |       |                  |
| P4479           | 22220857        | 81    | 72.5             |          |                 |       |                  |
| P4489           | 34624044        | 126   | 72.5             |          |                 |       |                  |

Table S2: Model comparisons among different models that predict the mutation rate by GC-content and chromatin modifications. Model terms are different linear model parts,  $\alpha$  is the intercept,  $\beta_{GC}$  is the slope effect of GC-content,  $\beta_{K9}$  is the effect of H3K9 domain,  $\beta_{K27}$  is the effect of H3K27 domain,  $\beta_C$  is the effect of centromeric domain,  $\beta_I$  is the interaction effect between GC-content and H3K9 domain,  $\beta_{I2}$  is the interaction effect between GC-content and centromeric domain,  $\beta_{I3}$  is the interaction effect between GC-content and H3K27 domain.  $d_i$ ,  $g_i$ , and  $c_i$  are indicator variables, and  $x_i$  is GC-content in percentage points. WAIC = widely applicable information criterion, SE = standard error.

| Model terms                                                                                               | WAIC    | diff ( $\pm$ SE) | weight |
|-----------------------------------------------------------------------------------------------------------|---------|------------------|--------|
| $\alpha + \beta_{GC}x_i + \beta_{K9}d_i + \beta_{K27}g_i + \beta_Cc_i + \beta_Ix_id_i$                    | 454.47  | 0 (0)            | 0.63   |
| $\alpha + \beta_{GC}x_i + \beta_{K9}d_i + \beta_{K27}g_i + \beta_Cc_i + \beta_Ix_id_i + \beta_{I3}x_ig_i$ | 456.86  | 2.39 (2.19)      | 0.19   |
| $\alpha + \beta_{GC}x_i + \beta_{K9}d_i + \beta_Cc_i + \beta_Ix_id_i$                                     | 458.67  | 4.2 (6.94)       | 0      |
| $\alpha + \beta_{GC}x_i + \beta_{K9}d_i$                                                                  | 458.84  | 4.37 (10.59)     | 0      |
| $\alpha + \beta_{GC}x_i + \beta_{K9}d_i + \beta_Cc_i + \beta_Ix_id_i + \beta_{I2}x_ic_i$                  | 460.35  | 5.88 (7.17)      | 0      |
| $\alpha + \beta_{GC}x_i + \beta_{K9}d_i + \beta_Ix_id_i$                                                  | 495.86  | 41.39 (19.86)    | 0      |
| $\alpha + \beta_{GC}x_i + \beta_{K9}d_i$                                                                  | 496.65  | 42.18 (22.43)    | 0      |
| $\alpha + \beta_{GC}x_i$                                                                                  | 546.62  | 92.15 (33.84)    | 0      |
| $\alpha + \beta_{K9}d_i + \beta_Cc_i$                                                                     | 614.83  | 160.36 (42.53)   | 0      |
| $\alpha + \beta_{K9}d_i$                                                                                  | 645.82  | 191.35 (49.19)   | 0      |
| $\alpha + \beta_Cc_i$                                                                                     | 1290.02 | 835.55 (255.52)  | 0      |
| $\alpha$                                                                                                  | 1689.56 | 1235.09 (264.15) | 0      |

Table S3: Model estimates for a model predicting mutation rate by GC-content, centromeric, H3K9, and H3K27 domains,  $\alpha$  is the intercept,  $\beta_{GC}$  is the slope effect of GC-content,  $\beta_{K9}$  is the effect of H3K9me domain,  $\beta_{K27}$  is the effect of the H3K27me3 domain,  $\beta_C$  is the effect of centromeric domain, and  $\beta_I$  is the interaction effect between GC-content and H3K9me domain.

| Parameter     | Estimate [95% HPDI]  |
|---------------|----------------------|
| $\alpha$      | -2.61 [-3.34, -1.88] |
| $\beta_C$     | 0.51 [0.35, 0.67]    |
| $\beta_{K9}$  | -0.14 [-0.93, 0.63]  |
| $\beta_{K27}$ | 0.32 [0.08, 0.55]    |
| $\beta_{GC}$  | -0.06 [-0.08, -0.05] |
| $\beta_I$     | 0.02 [0.00, 0.04]    |

Table S4: Model comparison among different models that predict the mutation rate by trinucleotide class and chromatin modifications. Model terms are different linear model parts.  $\alpha$  is the intercept,  $\beta_t$  is a vector of effects for the 32 trinucleotide classes,  $\beta_{K9}$  is the effect of H3K9 domain,  $\beta_{K27}$  is the effect of H3K27 domain,  $\beta_C$  is the effect of centromeric domain,  $\beta_I$  is the interaction effect between trinucleotide class and H3K9 domain,  $\beta_{I2}$  is the interaction effect between trinucleotide class and centromeric domain.  $d_i$ ,  $g_i$ , and  $c_i$  are indicator variables, and  $x_{[t]}$  is the trinucleotide class. WAIC = widely applicable information criterion, SE = standard error.

| Model terms                                                                                     | WAIC    | diff ( $\pm$ SE) | weight |
|-------------------------------------------------------------------------------------------------|---------|------------------|--------|
| $\beta_t x_{[t]} + \beta_{K9} d_i + \beta_{K27} g_i + \beta_C c_i$                              | 621.31  | 0 (0)            | 0.96   |
| $\beta_t x_{[t]} + \beta_{K9} d_i + \beta_C c_i$                                                | 627.79  | 6.47 (6.95)      | 0.04   |
| $\beta_t x_{[t]} + \beta_{K9} d_i + \beta_{K27} g_i + \beta_C c_i + \beta_I x_{[t]} d_i$        | 640.35  | 19.04 (14.69)    | 0      |
| $\beta_t x_{[t]} + \beta_{K9} d_i + \beta_C c_i + \beta_I x_{[t]} d_i$                          | 647.17  | 25.85 (16.26)    | 0      |
| $\beta_t x_{[t]} + \beta_{K9} d_i + \beta_C c_i + \beta_I x_{[t]} d_i + \beta_{I2} x_{[t]} c_i$ | 652.37  | 31.06 (18.55)    | 0      |
| $\beta_t x_{[t]} + \beta_{K9} d_i$                                                              | 693.47  | 72.15 (21.8)     | 0      |
| $\beta_t x_{[t]} + \beta_{K9} d_i + \beta_I x_{[t]} d_i$                                        | 717.79  | 96.48 (26.11)    | 0      |
| $\beta_{K9} d_i + \beta_C c_i$                                                                  | 996.07  | 374.76 (67.31)   | 0      |
| $\beta_{K9} d_i$                                                                                | 1043.35 | 422.04 (67.64)   | 0      |
| $\beta_C c_i$                                                                                   | 1370.5  | 749.19 (114.3)   | 0      |
| $\alpha$                                                                                        | 1776.5  | 1155.19 (135.53) | 0      |
| $\beta_t x_{[t]}$                                                                               | 1916.35 | 1295.03 (134.38) | 0      |



Table S5: Natural strains with sequencing data included in this study. Strains were obtained from FGSC. 33 strains were sequenced in this study and data for 23 strains were obtained from Zhao et al. (2015).

| Strain | Source     | Strain | Source              |
|--------|------------|--------|---------------------|
| 10948  | This study | P4452  | (Zhao et al., 2015) |
| 10886  | This study | P4463  | (Zhao et al., 2015) |
| 10932  | This study | P4468  | (Zhao et al., 2015) |
| 1165   | This study | P4471  | (Zhao et al., 2015) |
| 8816   | This study | P4476  | (Zhao et al., 2015) |
| 3223   | This study | P4479  | (Zhao et al., 2015) |
| 8845   | This study | 10882  | (Zhao et al., 2015) |
| 10908  | This study | 10883  | (Zhao et al., 2015) |
| 10904  | This study | 10884  | (Zhao et al., 2015) |
| 851    | This study | 10892  | (Zhao et al., 2015) |
| 1131   | This study | 10907  | (Zhao et al., 2015) |
| 8850   | This study | 10914  | (Zhao et al., 2015) |
| 8819   | This study | 10915  | (Zhao et al., 2015) |
| 4708   | This study | 10918  | (Zhao et al., 2015) |
| 4712   | This study | 10925  | (Zhao et al., 2015) |
| 6203   | This study | 10926  | (Zhao et al., 2015) |
| 4824   | This study | 10927  | (Zhao et al., 2015) |
| 8783   | This study | 10935  | (Zhao et al., 2015) |
| 8790   | This study | 10937  | (Zhao et al., 2015) |
| 3975   | This study | 10943  | (Zhao et al., 2015) |
| 10928  | This study | 10983  | (Zhao et al., 2015) |
| 10912  | This study | 3943   | (Zhao et al., 2015) |
| 3210   | This study | P4489  | (Zhao et al., 2015) |
| 10923  | This study |        |                     |
| 10950  | This study |        |                     |
| 10951  | This study |        |                     |
| 10946  | This study |        |                     |
| 3211   | This study |        |                     |
| 10906  | This study |        |                     |
| 5910   | This study |        |                     |
| 4730   | This study |        |                     |
| 1133   | This study |        |                     |
| 4716   | This study |        |                     |

Table S6: Detecting structural variants with different callers from simulated data. Callers tested were DELLY, Lumpy, SVaba, and Pindel. Different sets are simulations with different numbers of structural variants.

| set | Deletion | Duplication | Inversion | Translocation | Insertion | Inv-del | Total number of SV | DELLY       |      | Lumpy       |      | SVaba       |      | Pindel      |      |
|-----|----------|-------------|-----------|---------------|-----------|---------|--------------------|-------------|------|-------------|------|-------------|------|-------------|------|
|     |          |             |           |               |           |         |                    | sensitivity | FDR  | sensitivity | FDR  | sensitivity | FDR  | sensitivity | FDR  |
| 1   | 1        | 4           | 4         | 4             | 5         | 0       | 18                 | 0.90        | 0    | 0.90        | 0.55 | 0.60        | 0.60 | 0.55        | 0.65 |
| 2   | 7        | 15          | 5         | 8             | 5         | 0       | 40                 | 0.84        | 0.02 | 0.84        | 0.54 | 0.51        | 0.55 | 0.48        | 0.60 |
| 3   | 8        | 10          | 10        | 15            | 7         | 0       | 50                 | 0.88        | 0    | 0.88        | 0.54 | 0.64        | 0.52 | 0.38        | 0.61 |
| 4   | 6        | 20          | 20        | 20            | 14        | 0       | 100                | 0.54        | 0.33 | 0.54        | 0.60 | 0.36        | 0.77 | 0.28        | 0.94 |

Table S7: Calling CNVs on simulated data using either CNVnator with two different bin sizes, CNV-seq, or both callers together.

|                          | Sensitivity score | FDR score |
|--------------------------|-------------------|-----------|
| CNVnator (1670 bin size) | 0.375             | 0.556     |
| CNVnator (75 bin size)   | 0.968             | 0.797     |
| CNV-seq                  | 0.937             | 0.999     |
| Both callers             | 0.906             | 0.482     |
